# Supplementary material for: One-pot preparation of 4-aryl-3-bromocoumarins from 4-aryl-2-propynoic acids with diaryliodonium salts, TBAB, and Na2S2O8
Source: publisher site journal article supplement (doi:10.3762/bjoc.14.22), 2018-02-05

**Supporting Information**  
**for**  
**One-pot preparation of 4-aryl-3-bromocoumarins from**  
**4-aryl-2-propynoic acids with diaryliodonium salts,**  
**TBAB, and Na<sub>2</sub>S<sub>2</sub>O<sub>8</sub>**

Teppei Sasaki<sup>1</sup>, Katsuhiko Moriyama<sup>1,2</sup> and Hideo Togo\*<sup>1</sup>

Address: <sup>1</sup>Department of Chemistry, Graduate School of Science, Chiba University,  
Yayoi-cho 1-33, Inage-ku, Chiba 263-8522, Japan and <sup>2</sup>Molecular Chirality Research  
Center, Chiba University, Yayoi-cho 1-33, Inage-ku, Chiba 263-8522, Japan

Email: Hideo Togo - togo@faculty.chiba-u.jp

\*Corresponding author

**NMR charts of all coumarin derivatives 3Aa–3Ap, 3Ba–3Ea, and 4Aa–**  
**9Aa, and X-ray analytical data of 3Da**

**Table of contents**

|                                                                                                   |         |
|---------------------------------------------------------------------------------------------------|---------|
| Experimental section for compounds <b>3</b> and <b>4Aa–9Aa</b> -----                              | S1–S10  |
| <sup>1</sup> H NMR and <sup>13</sup> C NMR spectra of compounds <b>3</b> and <b>4Aa–9Aa</b> ----- | S11–S36 |

## General

<sup>1</sup>H NMR spectra were measured on 400 MHz spectrometers. Chemical shifts were recorded as follows: chemical shift in ppm from internal tetramethylsilane on the  $\delta$  scale, multiplicity (s = singlet; d = doublet; t = triplet; q = quartet; m = multiplet; br = broad), coupling constant (Hz), integration, and assignment. <sup>13</sup>C NMR spectra were measured on 100 MHz spectrometers. Chemical shifts were recorded in ppm from the solvent resonance employed as the internal standard (deuteriochloroform at 77.0 ppm). Characteristic peaks in the infrared (IR) spectra were recorded in wave number, cm<sup>-1</sup>. High-resolution mass spectra were recorded by Thermo Fisher Scientific Exactive Orbitrap mass spectrometers. Melting points were uncorrected. Thin-layer chromatography (TLC) was performed using 0.25 mm silica gel plates (60F-254). The products were purified by column chromatography on neutral silica gel 60N (63–210 mesh).

## Typical procedure for the one-pot conversion of 3-aryl-2-propynoic acids **1** into 4-aryl-3-bromocoumarins **3**

To a mixture of 3-phenyl-2-propynoic acid (**1a**, 0.5 mmol, 73.1 mg), CuCl (5 mol %, 2.5 mg), and K<sub>2</sub>CO<sub>3</sub> (0.25 mmol, 34.6 mg) in CH<sub>2</sub>Cl<sub>2</sub> (7.5 mL) was added diphenyliodonium trifluoromethanesulfonate (0.5 mmol, 215.1 mg). The flask was flushed with argon gas, and then the obtained mixture was stirred for 3 h at 50 °C. The solvent was removed, and TBAB (1.0 mmol, 322.4 mg), Na<sub>2</sub>S<sub>2</sub>O<sub>8</sub> (1.0 mmol, 238.1 mg), and DCE/H<sub>2</sub>O (1:1, 5.0 mL) were added to the residue. The obtained mixture was stirred for 19 h at 90 °C. Water (5.0 mL) was added to the reaction mixture and the product was extracted with CHCl<sub>3</sub> (15 mL  $\times$  3). The organic layer was dried over Na<sub>2</sub>SO<sub>4</sub>. After removal of the solvent under reduced pressure, the residue was purified by silica-gel column chromatography (eluent: *n*-hexane/EtOAc = 9:1) to give 3-bromo-4-phenylcoumarin (**3Aa**, 81.5 mg, 54% yield).

**3-Bromo-4-phenylcoumarin (3Aa)**<sup>I</sup>: Yield: 81.5 mg (54%); white solid; Mp: 146–147 °C; IR (neat) 1725, 1273, 1034 cm<sup>-1</sup>; <sup>1</sup>H-NMR (400 MHz, CDCl<sub>3</sub>):  $\delta$  = 7.08 (dd, 1H, *J* = 8.0, 1.6 Hz), 7.20 (td, 1H, *J* = 7.8, 1.1 Hz), 7.29–7.32 (m, 2H), 7.42 (dd, 1H, *J* = 8.3, 0.9 Hz), 7.52–7.60 (m, 4H); <sup>13</sup>C-NMR (100 MHz, CDCl<sub>3</sub>):  $\delta$  = 112.5, 116.7, 120.2, 124.7, 127.6, 128.0, 128.8, 129.3, 132.0, 135.2, 152.4, 154.6, 157.3; HRMS (APCI) Calcd for C<sub>15</sub>H<sub>10</sub>O<sub>2</sub>Br [M+H]<sup>+</sup> = 300.9859, Found = 300.9857.

**3-Bromo-4-(2'-methylphenyl)coumarin (3Ab):** Yield: 90.3 mg (57%); white solid; Mp: 99-100 °C; IR (neat) 1729, 1275, 1035  $\text{cm}^{-1}$ ;  $^1\text{H}$ -NMR (400 MHz,  $\text{CDCl}_3$ ):  $\delta$  = 2.12 (s, 3H), 6.93 (dd, 1H,  $J$  = 7.9, 1.4 Hz), 7.10 (d, 1H,  $J$  = 7.9 Hz), 7.18 (td, 1H,  $J$  = 7.4, 1.1 Hz), 7.35-7.46 (m, 4H), 7.57 (td, 1H,  $J$  = 7.6, 1.6 Hz);  $^{13}\text{C}$ -NMR (100 MHz,  $\text{CDCl}_3$ ):  $\delta$  = 19.2, 112.9, 116.8, 119.9, 124.9, 126.3, 127.1, 127.4, 129.4, 130.6, 132.1, 134.8, 134.9, 152.4, 155.0, 157.3; HRMS (APCI) Calcd for  $\text{C}_{16}\text{H}_{12}\text{O}_2\text{Br}$   $[\text{M}+\text{H}]^+ = 315.0015$ , Found = 315.0015.

**3-Bromo-4-(3'-methylphenyl)coumarin (3Ac):** Yield: 85.3 mg (54%); colorless oil; IR (neat) 1725, 1276, 1037  $\text{cm}^{-1}$ ;  $^1\text{H}$ -NMR (400 MHz,  $\text{CDCl}_3$ ):  $\delta$  = 2.45 (s, 3H), 7.10 (d, 1H,  $J$  = 8.7 Hz), 7.10 (d, 1H,  $J$  = 7.9 Hz), 7.10 (s, 1H), 7.19 (td, 1H,  $J$  = 7.9, 1.1 Hz), 7.34 (d, 1H,  $J$  = 7.5 Hz), 7.41 (dd, 1H,  $J$  = 8.4, 0.9 Hz), 7.45 (t, 1H,  $J$  = 7.9 Hz), 7.56 (td, 1H,  $J$  = 7.8, 1.6 Hz);  $^{13}\text{C}$ -NMR (100 MHz,  $\text{CDCl}_3$ ):  $\delta$  = 21.5, 112.4, 116.7, 120.3, 124.6, 125.0, 127.7, 128.4, 128.7, 130.0, 132.0, 135.1, 138.6, 152.4, 154.8, 157.4; HRMS (APCI) Calcd for  $\text{C}_{16}\text{H}_{12}\text{O}_2\text{Br}$   $[\text{M}+\text{H}]^+ = 315.0015$ , Found = 315.0015.

**3-Bromo-4-(4'-methylphenyl)coumarin (3Ad):**<sup>2</sup> Yield: 91.4 mg (58%); white solid; Mp: 163-164 °C; IR (neat) 1721, 1273, 1038  $\text{cm}^{-1}$ ;  $^1\text{H}$ -NMR (400 MHz,  $\text{CDCl}_3$ ):  $\delta$  = 2.48 (s, 3H), 7.12 (dd, 1H,  $J$  = 7.9, 1.6 Hz), 7.16-7.51 (m, 3H), 7.37 (d, 2H,  $J$  = 7.9 Hz), 7.41 (dd, 1H,  $J$  = 8.4, 0.9 Hz), 7.56 (td, 1H,  $J$  = 7.7, 1.8 Hz);  $^{13}\text{C}$ -NMR (100 MHz,  $\text{CDCl}_3$ ):  $\delta$  = 21.4, 112.6, 116.8, 120.4, 124.6, 127.7, 128.0, 129.5, 132.0, 132.3, 139.4, 152.4, 154.8, 157.5; HRMS (APCI) Calcd for  $\text{C}_{16}\text{H}_{12}\text{O}_2\text{Br}$   $[\text{M}+\text{H}]^+ = 315.0015$ , Found = 315.0015.

**3-Bromo-4-(4'-methoxyphenyl)coumarin (3Ae):**<sup>2</sup> Yield: 86.2 mg (52%); pale yellow solid; Mp: 167-168 °C; IR (neat) 1730, 1251, 1034  $\text{cm}^{-1}$ ;  $^1\text{H}$ -NMR (400 MHz,  $\text{CDCl}_3$ ):  $\delta$  = 3.91 (s, 3H), 7.08 (d, 2H,  $J$  = 8.8 Hz), 7.16 (dd, 1H,  $J$  = 8.2, 1.8 Hz), 7.20 (td, 1H,  $J$  = 7.6, 1.1 Hz), 7.26 (d, 2H,  $J$  = 8.8 Hz), 7.41 (d, 1H,  $J$  = 8.4 Hz), 7.56 (td, 1H,  $J$  = 7.6, 2.0 Hz);  $^{13}\text{C}$ -NMR (100 MHz,  $\text{CDCl}_3$ ):  $\delta$  = 55.3, 112.7, 114.1, 116.7, 120.4, 124.6, 127.2, 127.7, 129.7, 131.9, 152.3, 134.4, 157.4, 160.2; HRMS (APCI) Calcd for  $\text{C}_{16}\text{H}_{12}\text{O}_3\text{Br}$   $[\text{M}+\text{H}]^+ = 330.9964$ , Found = 330.9962.

**3-Bromo-4-(4'-fluorophenyl)coumarin (3Af):**<sup>2</sup> Yield: 82.3 mg (52%); white solid; Mp: 124-125 °C; IR (neat) 1710, 1275, 1038  $\text{cm}^{-1}$ ;  $^1\text{H}$ -NMR (400 MHz,  $\text{CDCl}_3$ ):  $\delta$  = 7.07 (dd, 1H,  $J$  = 8.0, 1.4 Hz), 7.21 (td, 1H,  $J$  = 7.6, 1.1 Hz), 7.23-7.33 (m, 4H), 7.42 (dd, 1H,  $J$  = 8.4, 0.9 Hz), 7.58 (td, 1H,  $J$  = 7.8, 1.6 Hz);  $^{13}\text{C}$ -NMR (100 MHz,  $\text{CDCl}_3$ ):  $\delta$

= 113.1, 116.2 ( $J_{\text{C-F}} = 21.9$  Hz), 116.9, 120.2, 124.8, 127.4, 130.2 ( $J_{\text{C-F}} = 8.6$  Hz), 131.1 ( $J_{\text{C-F}} = 3.8$  Hz), 132.2, 152.4, 153.7, 157.2, 163.1 ( $J_{\text{C-F}} = 249.9$  Hz); HRMS (APCI) Calcd for  $\text{C}_{15}\text{H}_9\text{O}_2\text{BrF}$   $[\text{M}+\text{H}]^+ = 318.9764$ , Found = 318.9764

**3-Bromo-4-(4'-chlorophenyl)coumarin (3Ag)<sup>2</sup>**: Yield: 152.2 mg (50%); white solid; Mp: 152-153 °C; IR (neat) 1717, 1277, 1037  $\text{cm}^{-1}$ ;  $^1\text{H}$ -NMR (400 MHz,  $\text{CDCl}_3$ ):  $\delta = 7.06$  (dd, 1H,  $J = 8.2, 1.6$  Hz), 7.21 (td, 1H,  $J = 7.6, 1.1$  Hz), 7.25-7.28 (m, 2H), 7.42 (dd, 1H,  $J = 8.4, 1.1$  Hz), 7.56 (d, 2H,  $J = 8.4$  Hz), 7.58 (td, 1H,  $J = 7.8, 1.6$  Hz);  $^{13}\text{C}$ -NMR (100 MHz,  $\text{CDCl}_3$ ):  $\delta = 112.9, 117.0, 120.0, 124.8, 127.3, 129.3, 129.6, 132.3, 133.5, 135.6, 152.4, 153.5, 157.1$ ; HRMS (APCI) Calcd for  $\text{C}_{15}\text{H}_9\text{O}_2\text{BrCl}$   $[\text{M}+\text{H}]^+ = 334.9469$ , Found = 334.9468.

**3-Bromo-4-(2'-chlorophenyl)coumarin (3Ah)**: Yield: 106.7 mg (64%); white solid; Mp: 162-163 °C; IR (neat) 1732, 1277, 1036  $\text{cm}^{-1}$ ;  $^1\text{H}$ -NMR (400 MHz,  $\text{CDCl}_3$ ):  $\delta = 6.94$  (dd, 1H,  $J = 7.9, 1.4$  Hz), 7.21 (t, 1H,  $J = 7.7$  Hz), 7.25 (dd, 1H,  $J = 7.3, 2.0$  Hz), 7.43 (d, 1H,  $J = 8.4$  Hz), 7.45-7.53 (m, 2H), 7.56-7.62 (m, 2H);  $^{13}\text{C}$ -NMR (100 MHz,  $\text{CDCl}_3$ ):  $\delta = 113.6, 116.8, 119.4, 124.9, 126.8, 127.4, 129.4, 130.0, 130.8, 132.0, 132.1, 134.2, 152.3, 152.4, 157.1$ ; HRMS (APCI) Calcd for  $\text{C}_{15}\text{H}_9\text{O}_2\text{BrCl}$   $[\text{M}+\text{H}]^+ = 334.9469$ , Found = 334.9468.

**3-Bromo-4-(3'-chlorophenyl)coumarin (3Ai)**: Yield: 95.2 mg (57%); white solid; Mp: 138-139 °C; IR (neat) 1715, 1276, 1038  $\text{cm}^{-1}$ ;  $^1\text{H}$ -NMR (400 MHz,  $\text{CDCl}_3$ ):  $\delta = 7.06$  (dd, 1H,  $J = 8.0, 1.6$  Hz), 7.18-7.25 (m, 2H), 7.32 (s, 1H), 7.42 (d, 1H,  $J = 8.4$  Hz), 7.49-7.55 (m, 2H), 7.59 (td, 1H,  $J = 8.0, 1.6$  Hz);  $^{13}\text{C}$ -NMR (100 MHz,  $\text{CDCl}_3$ ):  $\delta = 112.8, 116.8, 119.7, 124.8, 126.3, 127.2, 128.0, 129.5, 130.3, 132.2, 134.8, 136.7, 152.2, 152.9, 156.9$ ; HRMS (APCI) Calcd for  $\text{C}_{15}\text{H}_9\text{O}_2\text{BrCl}$   $[\text{M}+\text{H}]^+ = 334.9469$ , Found = 334.9468.

**3-Bromo-4-(4'-bromophenyl)coumarin (3Aj)**: Yield: 95.2 mg (51%); white solid; Mp: 154-155 °C; IR (neat) 1718, 1276, 1037  $\text{cm}^{-1}$ ;  $^1\text{H}$ -NMR (400 MHz,  $\text{CDCl}_3$ ):  $\delta = 7.06$  (dd, 1H,  $J = 7.9, 1.6$  Hz), 7.18-7.23 (m, 3H), 7.42 (dd, 1H,  $J = 8.4, 1.1$  Hz), 7.58 (td, 1H,  $J = 7.9, 1.6$  Hz), 7.72 (d, 2H,  $J = 8.6$  Hz);  $^{13}\text{C}$ -NMR (100 MHz,  $\text{CDCl}_3$ ):  $\delta = 112.8, 116.9, 119.9, 123.8, 124.8, 127.2, 129.8, 132.2, 132.2, 134.0, 152.4, 153.4, 157.1$ ; HRMS (APCI) Calcd for  $\text{C}_{15}\text{H}_9\text{O}_2\text{Br}_2$   $[\text{M}+\text{H}]^+ = 378.8964$ , Found = 378.8966.

**4-(Biphenyl-4'-yl)-3-bromocoumarin (3Ak)**: Yield: 107.6 mg (57%); yellow solid;

Mp: 199-200 °C; IR (neat) 1733, 1275, 1036  $\text{cm}^{-1}$ ;  $^1\text{H}$ -NMR (400 MHz,  $\text{CDCl}_3$ ):  $\delta$  = 7.18 (dd, 1H,  $J$  = 8.0, 1.8 Hz), 7.22 (td, 1H,  $J$  = 7.4, 1.1 Hz), 7.39 (d, 2H,  $J$  = 8.4 Hz), 7.43 (d, 2H,  $J$  = 8.6 Hz), 7.51 (t, 2H,  $J$  = 7.3 Hz), 7.58 (td, 1H,  $J$  = 7.6, 2.0 Hz), 7.69 (d, 2H,  $J$  = 7.5 Hz), 7.79 (d, 2H,  $J$  = 8.4 Hz);  $^{13}\text{C}$ -NMR (100 MHz,  $\text{CDCl}_3$ ):  $\delta$  = 112.6, 116.8, 120.2, 124.7, 127.1, 127.4, 127.6, 127.9, 128.6, 128.9, 132.0, 134.0, 139.9, 142.1, 152.4, 154.4, 157.3; HRMS (APCI) Calcd for  $\text{C}_{21}\text{H}_{14}\text{O}_2\text{Br}$   $[\text{M}+\text{H}]^+ = 377.0172$ , Found = 377.0170.

**3-Bromo-4-(naphthalen-2'-yl)coumarin (3Al):** Yield: 88.3 mg (50%); white solid; Mp: 180-181 °C; IR (neat) 1721, 1275, 1038  $\text{cm}^{-1}$ ;  $^1\text{H}$ -NMR (400 MHz,  $\text{CDCl}_3$ ):  $\delta$  = 7.11 (dd, 1H,  $J$  = 8.0, 1.6 Hz), 7.17 (td, 1H,  $J$  = 7.6, 1.1 Hz), 7.40 (dd, 1H,  $J$  = 8.4, 1.8 Hz), 7.44 (dd, 1H,  $J$  = 8.3, 0.7 Hz), 7.55-7.65 (m, 3H), 7.81 (s, 1H), 7.90-7.99 (m, 2H), 8.04 (d, 1H,  $J$  = 8.6 Hz);  $^{13}\text{C}$ -NMR (100 MHz,  $\text{CDCl}_3$ ):  $\delta$  = 112.8, 116.8, 120.3, 124.7, 125.3, 126.9, 127.2, 127.7, 127.7, 127.9, 128.3, 128.7, 132.1, 132.5, 132.8, 133.2, 152.4, 154.6, 157.4; HRMS (APCI) Calcd for  $\text{C}_{19}\text{H}_{12}\text{O}_2\text{Br}$   $[\text{M}+\text{H}]^+ = 351.0015$ , Found = 351.0013.

**3-Bromo-4-(naphthalen-1'-yl)coumarin (3Am):** Yield: 98.3 mg (56%); white solid; Mp: 106-107 °C; IR (neat) 1731, 1277, 1035  $\text{cm}^{-1}$ ;  $^1\text{H}$ -NMR (400 MHz,  $\text{CDCl}_3$ ):  $\delta$  = 6.83 (dd, 1H,  $J$  = 8.0, 1.6 Hz), 7.08 (dt, 1H,  $J$  = 7.6, 1.1 Hz), 7.39 (dd, 1H,  $J$  = 7.0, 1.1 Hz), 7.44-7.48 (m, 3H), 7.54-7.58 (m, 2H), 7.65 (t, 1H,  $J$  = 7.6 Hz), 7.99 (d, 1H,  $J$  = 8.2 Hz), 8.04 (d, 1H,  $J$  = 8.2 Hz);  $^{13}\text{C}$ -NMR (100 MHz,  $\text{CDCl}_3$ ):  $\delta$  = 114.1, 116.8, 120.6, 124.6, 124.8, 125.4, 126.0, 126.7, 127.2, 127.7, 128.7, 129.6, 129.7, 132.1, 132.8, 133.5, 152.3, 154.1, 157.3; HRMS (APCI) Calcd for  $\text{C}_{19}\text{H}_{12}\text{O}_2\text{Br}$   $[\text{M}+\text{H}]^+ = 351.0015$ , Found = 351.0014.

**4-(Benzo[b]thiophen-2'-yl)-3-bromocoumarin (3An):** Yield: 82.7 mg (46%); red solid; Mp: 214-215 °C; IR (neat) 1722, 1272, 1038  $\text{cm}^{-1}$ ;  $^1\text{H}$ -NMR (400 MHz,  $\text{CDCl}_3$ ):  $\delta$  = 7.23 (td, 1H,  $J$  = 7.7, 0.9 Hz), 7.39 (dd, 1H,  $J$  = 8.0, 1.4 Hz), 7.39 (s, 1H), 7.43 (d, 1H,  $J$  = 8.4 Hz), 7.45-7.51 (m, 2H), 7.59 (td, 1H,  $J$  = 7.8, 1.6 Hz), 7.88-7.96 (m, 2H);  $^{13}\text{C}$ -NMR (100 MHz,  $\text{CDCl}_3$ ):  $\delta$  = 115.2, 116.8, 120.2, 122.4, 124.4, 124.9, 125.0, 125.5, 125.8, 127.4, 132.3, 134.8, 139.1, 140.6, 148.5, 152.1, 156.9; HRMS (APCI) Calcd for  $\text{C}_{17}\text{H}_{10}\text{O}_2\text{BrS}$   $[\text{M}+\text{H}]^+ = 356.9579$ , Found = 356.9579.

**4-(Benzofuran-2'-yl)-3-bromocoumarin (3Ao):** Yield: 73.0 mg (43%); white solid; Mp: 129-130 °C; IR (neat) 1739, 1278, 1038  $\text{cm}^{-1}$ ;  $^1\text{H}$ -NMR (400 MHz,  $\text{CDCl}_3$ ):  $\delta$  =

7.28-7.31 (m, 2H), 7.37 (t, 1H,  $J = 7.7$  Hz), 7.41-7.48 (m, 2H), 7.57-7.64 (m, 3H), 7.75 (d, 1H,  $J = 7.9$  Hz);  $^{13}\text{C}$ -NMR (100 MHz,  $\text{CDCl}_3$ ):  $\delta = 111.7, 111.8, 114.3, 117.0, 118.8, 122.0, 123.8, 124.9, 126.1, 127.1, 127.4, 132.3, 143.5, 148.1, 152.3, 155.0, 157.1$ ; HRMS (APCI) Calcd for  $\text{C}_{17}\text{H}_{10}\text{O}_3\text{Br}$   $[\text{M}+\text{H}]^+ = 340.9808$ , Found = 340.9808.

**3-Bromo-4-propylcoumarin (3Ap):** Yield: 55.6 mg (42%); white solid; Mp: 58-59 °C; IR (neat) 2931, 1720, 1272, 1036  $\text{cm}^{-1}$ ;  $^1\text{H}$ -NMR (400 MHz,  $\text{CDCl}_3$ ):  $\delta = 1.13$  (s, 3H,  $J = 7.3$  Hz), 1.72 (sextet, 2H,  $J = 8.2$  Hz), 3.03 (t, 2H,  $J = 8.2$  Hz), 7.34 (td, 1H,  $J = 7.7, 1.1$  Hz), 7.37 (d, 1H,  $J = 8.2$  Hz), 7.57 (td, 1H,  $J = 7.7, 1.4$  Hz), 7.66 (dd, 1H,  $J = 8.2, 1.4$  Hz);  $^{13}\text{C}$ -NMR (100 MHz,  $\text{CDCl}_3$ ):  $\delta = 14.3, 21.5, 34.6, 112.7, 117.2, 118.9, 124.8, 124.8, 131.8, 152.1, 154.7, 157.1$ ; HRMS (APCI) Calcd for  $\text{C}_{12}\text{H}_{12}\text{O}_2\text{Br}$   $[\text{M}+\text{H}]^+ = 267.0015$ , Found = 267.0015.

**3-Bromo-7-methyl-4-phenylcoumarin (3Ba):** Yield: 95.2 mg (60%); white solid; Mp: 186-187 °C; IR (neat) 1722, 1255, 1022  $\text{cm}^{-1}$ ;  $^1\text{H}$ -NMR (400 MHz,  $\text{CDCl}_3$ ):  $\delta = 2.44$  (s, 3H), 6.95 (d, 1H,  $J = 8.2$  Hz), 7.00 (dd, 1H,  $J = 8.2, 0.9$  Hz), 7.21 (s, 1H), 7.29 (dd, 2H,  $J = 7.6, 1.4$  Hz), 7.51-7.59 (m, 3H);  $^{13}\text{C}$ -NMR (100 MHz,  $\text{CDCl}_3$ ):  $\delta = 21.6, 111.2, 116.8, 117.9, 125.9, 127.2, 128.0, 128.7, 129.2, 135.3, 143.5, 152.4, 154.6, 157.6$ ; HRMS (APCI) Calcd for  $\text{C}_{16}\text{H}_{12}\text{O}_2\text{Br}$   $[\text{M}+\text{H}]^+ = 315.0015$ , Found = 315.0014.

**3-Bromo-7-(tert-butyl)-4-phenylcoumarin (3Ca):** Yield: 124.6 mg (70%); white solid; Mp: 132-133 °C; IR (neat) 2951, 1718, 1281, 1031  $\text{cm}^{-1}$ ;  $^1\text{H}$ -NMR (400 MHz,  $\text{CDCl}_3$ ):  $\delta = 1.34$  (s, 9H), 7.01 (d, 1H,  $J = 8.4$  Hz), 7.22 (dd, 1H,  $J = 8.4, 1.8$  Hz), 7.27-7.33 (m, 2H), 7.41 (d, 1H,  $J = 1.8$  Hz), 7.50-7.58 (m, 3H);  $^{13}\text{C}$ -NMR (100 MHz,  $\text{CDCl}_3$ ):  $\delta = 30.8, 35.1, 111.3, 113.4, 117.7, 122.2, 127.1, 127.9, 128.7, 129.2, 135.2, 152.3, 154.4, 156.6, 157.6$ ; HRMS (APCI) Calcd for  $\text{C}_{19}\text{H}_{18}\text{O}_2\text{Br}$   $[\text{M}+\text{H}]^+ = 357.0485$ , Found = 357.0484.

**3-Bromo-7-chloro-4-phenylcoumarin (3Da):** Yield: 77.6 mg (46%); white solid; Mp: 191-192 °C; IR (neat) 1731, 1237, 1034  $\text{cm}^{-1}$ ;  $^1\text{H}$ -NMR (400 MHz,  $\text{CDCl}_3$ ):  $\delta = 7.01$  (d, 1H,  $J = 8.6$  Hz), 7.16 (dd, 1H,  $J = 8.7, 1.8$  Hz), 7.27-7.30 (m, 2H), 7.42 (s, 1H), 7.52-7.60 (m, 3H);  $^{13}\text{C}$ -NMR (100 MHz,  $\text{CDCl}_3$ ):  $\delta = 112.5, 117.0, 118.9, 125.3, 127.9, 128.4, 128.9, 129.5, 134.8, 137.9, 152.5, 153.9, 156.7$ ; HRMS (APCI) Calcd for  $\text{C}_{15}\text{H}_9\text{O}_2\text{BrCl}$   $[\text{M}+\text{H}]^+ = 334.9469$ , Found = 334.9469.

**Crystal Data for 3-Bromo-7-chloro-4-phenylcoumarin 3Da:** Formula  $C_{15}H_8BrClO_2$ , colorless, crystal dimensions  $0.20 \times 0.20 \times 0.10 \text{ mm}^3$ , Plate, space group  $P 1 21/c 1'$ ,  $a = 9.6791(10) \text{ \AA}$ ,  $b = 15.5782(17) \text{ \AA}$ ,  $c = 8.9056(10) \text{ \AA}$ ,  $\alpha = 90^\circ$ ,  $\beta = 102.9168(15)^\circ$ ,  $\gamma = 90^\circ$ ,  $V = 1308.8(2) \text{ \AA}^3$ ,  $Z = 4$ ,  $\rho_{\text{calc}} = 1.269 \text{ g cm}^{-3}$ ,  $F(000) = 664$ ,  $\mu(\text{MoK}\alpha) = 3.337 \text{ mm}^{-1}$ ,  $T = 173 \text{ K}$ . 7298 reflections collected, 2994 independent reflections with  $I > 2\sigma(I)$  ( $2\theta_{\text{max}} = 27.56^\circ$ ), and 172 parameters were used for the solution of structure. The non-hydrogen atoms were refined anisotropically.  $R_1 = 0.0286$  and  $wR_2 = 0.0657$ . GOF = 1.053. Crystallographic data (excluding structure factors) for the structure reported in this paper have been deposited with the Cambridge Crystallographic Data Centre as supplementary publication no. CCDC-1587945. Copies of the data can be obtained free of charge on application to CCDC, 12 Union Road, Cambridge CB2 1EZ, UK [Fax: int. code + 44(1223)336-033; E-mail: deposit@ccdc.cam.ac.uk].

**3,7-Dibromo-4-phenylcoumarin (3Ea):** Yield: 79.5 mg (42%); white solid; Mp: 186-187 °C; IR (neat) 1730, 1235, 1069  $\text{cm}^{-1}$ ;  $^1\text{H-NMR}$  (400 MHz,  $\text{CDCl}_3$ ):  $\delta = 6.94$  (d, 1H,  $J = 8.6 \text{ Hz}$ ), 7.27-7.33 (m, 3H), 7.54-7.61 (m, 4H);  $^{13}\text{C-NMR}$  (100 MHz,  $\text{CDCl}_3$ ):  $\delta = 112.7, 119.3, 119.9, 125.9, 127.9, 128.1, 128.6, 129.0, 129.5, 134.7, 152.4, 154.0, 156.7$ ; HRMS (APCI) Calcd for  $C_{15}H_9O_2Br_2 [M+H]^+ = 378.8964$ , Found = 378.8964.

#### Preparation of 4-phenylcoumarin (4Aa)

To a mixture of 3-bromo-4-phenylcoumarin (**3Aa**, 0.5 mmol, 150.6 mg) in EtOH (7.5 mL) was added Zn powder (5 mmol, 363.3 mg). Under argon atmosphere, the obtained mixture was stirred for 16 h at refluxing temperature. The cooled mixture was filtered through celite, and then the filtrate was concentrated under reduced pressure. The residue was purified by column chromatography on silica gel (eluent: *n*-hexane/AcOEt = 9:1) to afford 4-phenylcoumarin (**4Aa**, 89.9 mg, 81% yield).

**4-Phenylcoumarin (4Aa)**<sup>3</sup>: Yield: 89.9 mg (81%); white solid; IR (neat) 1722, 1277, 1034  $\text{cm}^{-1}$ ;  $^1\text{H-NMR}$  (400 MHz,  $\text{CDCl}_3$ ):  $\delta = 6.39$  (s, 1H), 7.24 (td, 1H,  $J = 7.7, 0.9 \text{ Hz}$ ), 7.42 (dd, 1H,  $J = 8.3, 0.9 \text{ Hz}$ ), 7.45-7.59 (m, 7H);  $^{13}\text{C-NMR}$  (100 MHz,  $\text{CDCl}_3$ ):  $\delta = 115.2, 117.3, 119.0, 124.1, 127.0, 128.4, 128.8, 129.7, 131.9, 135.2, 154.2, 155.7, 160.8$ ; HRMS (APCI) Calcd for  $C_{15}H_{11}O_2 [M+H]^+ = 223.0754$ , Found = 223.0753.

#### Preparation of 4-phenyl-3-(4'-methylbenzenesulfenyl)coumarin (5Aa)

To a mixture of 3-bromo-4-phenylcoumarin (**3Aa**, 0.5 mmol, 150.6 mg) and  $\text{K}_2\text{CO}_3$  (1.5 mmol, 103.7 mg), CuI (0.010 mmol, 9.6 mg), and DMEDA (0.020 mmol, 10  $\mu\text{L}$ ) in

toluene (2.0 mL) was added *p*-toluenethiol (1.2 mmol, 74.6 mg). Under argon atmosphere, the obtained mixture was stirred for 2 h at 135 °C. Saturated NaHCO<sub>3</sub> aqueous solution (5.0 mL) was added to the reaction mixture, and the product was extracted with CHCl<sub>3</sub> (15 mL × 3). The organic layer was dried over Na<sub>2</sub>SO<sub>4</sub>. After removal of the solvent under reduced pressure, the residue was purified by silica-gel column chromatography (eluent: *n*-hexane/EtOAc = 9:1) to give 4-phenyl-3-(4'-methylbenzenesulfenyl)coumarin (**5Aa**, 106.6 mg, 62% yield).

**4-Phenyl-3-(4'-methylbenzenesulfenyl)coumarin (5Aa):** Yield: 106.6 mg (62%); yellow oil; IR(neat) 1719, 1276, 1036 cm<sup>-1</sup>; <sup>1</sup>H-NMR (400 MHz, CDCl<sub>3</sub>): δ = 2.28 (s, 3H), 7.02 (d, 2H, *J* = 7.9 Hz), 7.08-7.20 (m, 3H), 7.18 (td, 1H, *J* = 7.8, 1.1 Hz), 7.24-7.28 (m, 1H), 7.39 (dd, 1H, *J* = 8.4, 0.9 Hz), 7.47-7.60 (m, 5H); <sup>13</sup>C-NMR (100 MHz, CDCl<sub>3</sub>): δ = 21.0, 116.7, 120.4, 122.3, 124.2, 128.0, 128.3, 128.4, 128.9, 129.7, 129.8, 131.0, 132.0, 134.8, 136.8, 153.2, 158.3, 159.1; HRMS (APCI) Calcd for C<sub>22</sub>H<sub>17</sub>O<sub>2</sub>S [M+H]<sup>+</sup> = 345.0944, Found = 345.0943.

#### **Preparation of 3-(4'-methoxybenzoylamino)-4-phenylcoumarin (6Aa)**

To a mixture of 3-bromo-4-phenylcoumarin (**3Aa**, 0.5 mmol, 150.6 mg) and K<sub>2</sub>CO<sub>3</sub> (1.5 mmol, 103.7 mg), CuI (0.010 mmol, 9.6 mg), and DMEDA (0.020 mmol, 10 μL) in toluene (2.0 mL) was added *p*-methoxybenzamide (1.2 mmol, 90.7 mg). Under argon atmosphere, the obtained mixture was stirred for 2 h at 135 °C. Saturated NaHCO<sub>3</sub> aqueous solution (5.0 mL) was added to the reaction mixture, and the product was extracted with CHCl<sub>3</sub> (15 mL × 3). The organic layer was dried over Na<sub>2</sub>SO<sub>4</sub>. The organic layer was dried over Na<sub>2</sub>SO<sub>4</sub>. After removal of the solvent under reduced pressure, the residue was purified by silica-gel column chromatography (eluent: *n*-hexane/EtOAc = 1:1) to give *N*-(4'-phenylcoumarin-3'-yl)-4-methoxybenzamide (**6Aa**, 95.2 mg, 51% yield).

**3-(4'-Methoxybenzoylamino)-4-phenylcoumarin (6Aa):** Yield: 95.2 mg (51%); white solid; Mp: 234-235 °C; IR(neat) 1718, 1654, 1605, 1254, 1029 cm<sup>-1</sup>; <sup>1</sup>H-NMR (400 MHz, CDCl<sub>3</sub>): δ = 3.83 (s, 3H), 6.87 (d, 2H, *J* = 8.8 Hz), 7.23 (td, 1H, *J* = 7.6, 1.1 Hz), 7.33 (dd, 1H, *J* = 8.0, 1.4 Hz), 7.37-7.49 (m, 6H), 7.54 (td, 1H, *J* = 7.6, 1.6 Hz), 7.64 (d, 2H, *J* = 8.8 Hz); <sup>13</sup>C-NMR (100 MHz, CDCl<sub>3</sub>): δ = 55.4, 113.7, 116.8, 120.2, 120.8, 124.6, 125.7, 127.2, 128.4, 128.5, 128.9, 129.3, 131.2, 133.1, 147.2, 151.9, 160.0, 162.6, 165.3; HRMS (APCI) Calcd for C<sub>23</sub>H<sub>18</sub>O<sub>4</sub>N [M+H]<sup>+</sup> = 372.1230, Found = 372.1228.



#### Preparation of (*E*)-3-(4'-methylstyryl)-4-phenylcoumarin (7Aa)

To a mixture of 3-bromo-4-phenylcoumarin (**3Aa**) (0.5 mmol, 150.6 mg), K<sub>2</sub>CO<sub>3</sub> (1.0 mmol, 138.2 mg), and PdCl<sub>2</sub>(PPh<sub>3</sub>)<sub>2</sub> (0.010 mmol, 7.0 mg) in DMF (5.0 mL) was added 4-methylstyrene (1.0 mmol, 68  $\mu$ L). Under argon atmosphere, the obtained mixture was stirred for 3 h at 90 °C. Saturated NaHCO<sub>3</sub> aqueous solution (5.0 mL) was added to the reaction mixture, and the product was extracted with EtOAc (15 mL  $\times$  3), and washed with brine (15 mL). The organic layer was dried over Na<sub>2</sub>SO<sub>4</sub>. After removal of the solvent under reduced pressure, the residue was purified by silica-gel column chromatography (eluent: *n*-hexane:EtOAc = 9:1) to give (*E*)-3-(4'-methylstyryl)-4-phenylcoumarin (**7Aa**) (133.4 mg, 79% yield).

**(*E*)-3-(4'-Methylstyryl)-4-phenylcoumarin (7Aa):** Yield: 133.4 mg (79%); light yellow solid; Mp: 129-130 °C; IR (neat) 3067, 1715, 1256, 969 cm<sup>-1</sup>; <sup>1</sup>H-NMR (400 MHz, CDCl<sub>3</sub>):  $\delta$  = 2.30 (s, 3H), 6.65 (d, 1H, *J* = 16.2 Hz), 7.04-7.08 (m, 3H), 7.12-7.17 (m, 3H), 7.29-7.33 (m, 2H), 7.38 (dd, 1H, *J* = 8.2, 1.1 Hz), 7.48 (td, 1H, *J* = 7.8, 1.6 Hz), 7.52-7.60 (m, 3H), 7.91 (d, 1H, *J* = 16.2 Hz); <sup>13</sup>C-NMR (100 MHz, CDCl<sub>3</sub>):  $\delta$  = 21.3, 116.4, 120.8, 120.9, 121.6, 124.1, 126.8, 127.4, 128.8, 128.9, 129.0, 129.3, 130.9, 134.7, 134.9, 135.6, 138.1, 149.8, 152.1, 160.0; HRMS (APCI) Calcd for C<sub>24</sub>H<sub>19</sub>O<sub>2</sub> [M+H]<sup>+</sup> = 339.1380, Found = 339.1377.

#### Preparation of 4-phenyl-3-(phenylethynyl)coumarin (8Aa)

To a mixture of 3-bromo-4-phenylcoumarin (**3Aa**, 0.5 mmol, 150.6 mg) and CuI (0.010 mmol, 1.9 mg) and PdCl<sub>2</sub>(PPh<sub>3</sub>)<sub>2</sub> (0.010 mmol, 7.0 mg) in Et<sub>3</sub>N (2.5 mL) was added ethynylbenzene (0.6 mmol, 66  $\mu$ L). Under argon atmosphere, the obtained mixture was stirred for 3 h at 60 °C. Water (2.5 mL) was added to the reaction mixture, and the product was extracted with EtOAc (15 mL  $\times$  3), and washed with brine (15 mL). The organic layer was dried over Na<sub>2</sub>SO<sub>4</sub>. After removal of the solvent under reduced pressure, the residue was purified by silica-gel column chromatography (eluent: *n*-hexane:EtOAc = 9:1) to give 4-phenyl-3-(phenylethynyl)coumarin (**8Aa**, 96.4 mg, 60% yield).

**4-Phenyl-3-(phenylethynyl)coumarin (8Aa):** Yield: 96.4 mg (60%); yellow solid; Mp: 159-160 °C; IR (neat) 2207, 1716, 1246, 1064 cm<sup>-1</sup>; <sup>1</sup>H-NMR (400 MHz, CDCl<sub>3</sub>):  $\delta$  = 7.19-7.33 (m, 7H), 7.42 (dd, 1H, *J* = 8.4, 0.9 Hz), 7.48-7.61 (m, 6H); <sup>13</sup>C-NMR (100 MHz, CDCl<sub>3</sub>):  $\delta$  = 83.7, 98.7, 111.1, 117.0, 119.7, 122.4, 124.5, 127.6, 128.2, 128.4, 128.8, 129.1, 129.4, 131.7, 132.0, 134.3, 152.8, 156.2, 159.5; HRMS (APCI) Calcd for

$C_{23}H_{15}O_2 [M+H]^+ = 323.1067$ , Found = 323.1064.

### Preparation of 3,4-diphenylcoumarin (9Aa)

To a mixture of 3-bromo-4-phenylcoumarin (**3Aa**, 0.5 mmol, 150.6 mg) and  $PhB(OH)_2$  (1.0 mmol, 121.9 mg) in DMF (10 mL) was added  $PdCl_2(PPh_3)_2$  (0.025 mmol, 17.5 mg). Under the argon atmosphere, the obtained mixture was stirred for 30 min at room temperature. Then,  $K_2CO_3$  (1.0 mmol, 138.2 mg) in  $H_2O$  (2 mL) was added to the mixture, and the obtained mixture was stirred for 1.5 h at 60 °C. Water (5 mL) was added to the reaction mixture, and the product was extracted with  $CH_2Cl_2$  (15 mL  $\times$  3), and washed with brine (15 mL  $\times$  2). The organic layer was dried over  $Na_2SO_4$ . After removal of the solvent under reduced pressure, the residue was purified by silica-gel column chromatography (eluent: *n*-hexane/EtOAc = 9:1) to give 3,4-diphenylcoumarin (**9Aa**, 113.7 mg, 76% yield).

**3,4-Diphenylcoumarin (9Aa)<sup>I</sup>**: Yield: 113.7 mg (76%); white solid; Mp: 223-224 °C; IR (neat) 1711, 1297, 1038  $cm^{-1}$ ;  $^1H$ -NMR (400 MHz,  $CDCl_3$ ):  $\delta$  = 7.10-7.25 (m, 9H), 7.28-7.35 (m, 3H), 7.44 (dd, 1H,  $J$  = 8.3, 0.7 Hz), 7.54 (td, 1H,  $J$  = 7.4, 2.0 Hz);  $^{13}C$ -NMR (100 MHz,  $CDCl_3$ ):  $\delta$  = 116.7, 120.4, 124.1, 126.9, 127.6, 127.7, 127.8, 128.2, 128.3, 129.3, 130.5, 131.4, 133.8, 134.4, 151.6, 153.2, 161.3; HRMS (APCI) Calcd for  $C_{21}H_{15}O_2 [M+H]^+ = 299.1067$ , Found = 299.1065.

### References

1. Zhang, L.; Meng, T.; Fan, T.; Wu, J. *J. Org. Chem.* **2007**, 72, 7279-7286.
2. Qiu, G.; Liu, T.; Ding, Q. *Org. Chem. Front.* **2016**, 3, 510-515.
3. Sasaki, T.; Miyagi, K.; Moriyama, K.; Togo, H. *Org. Lett.* **2016**, 18, 944-947.







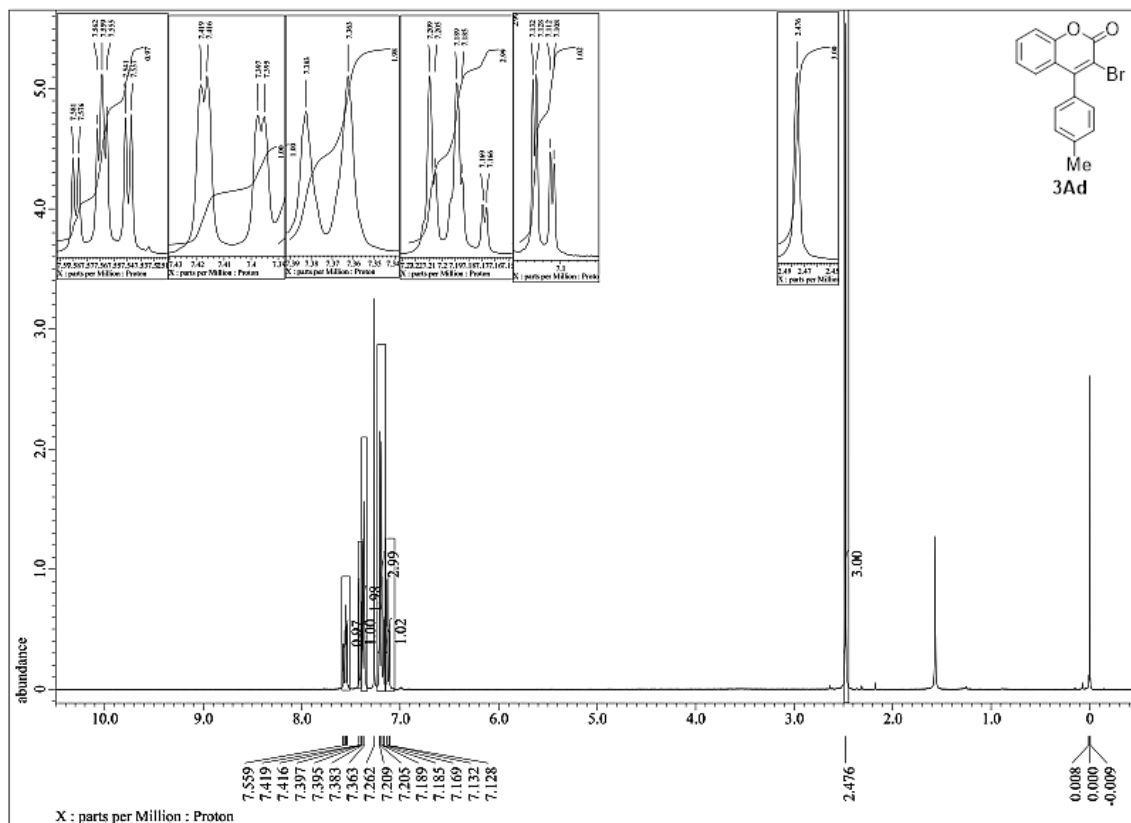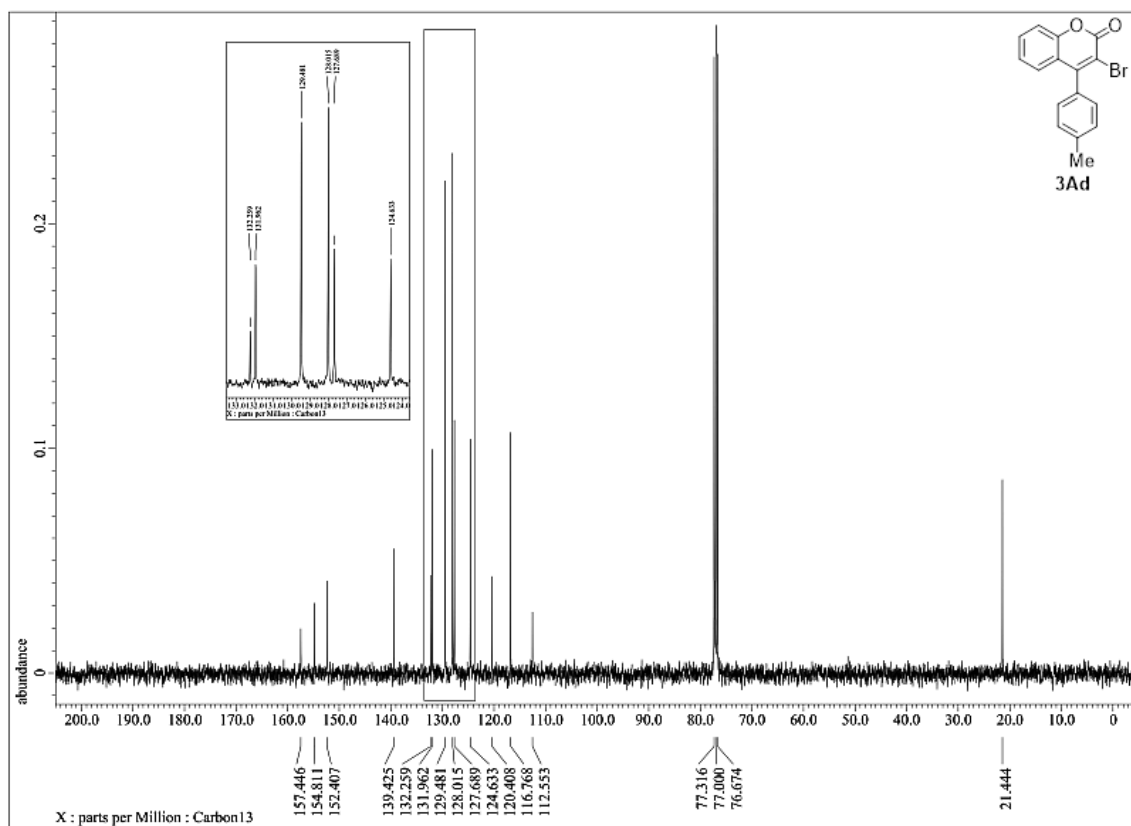



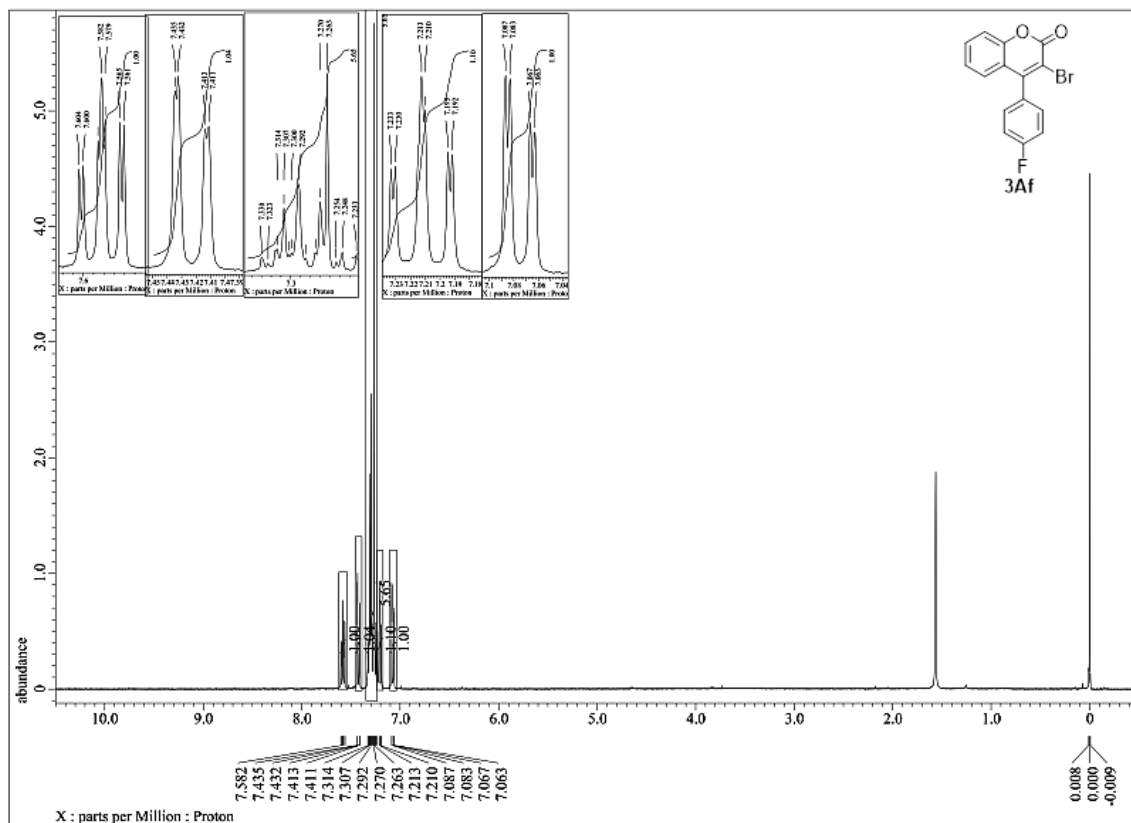







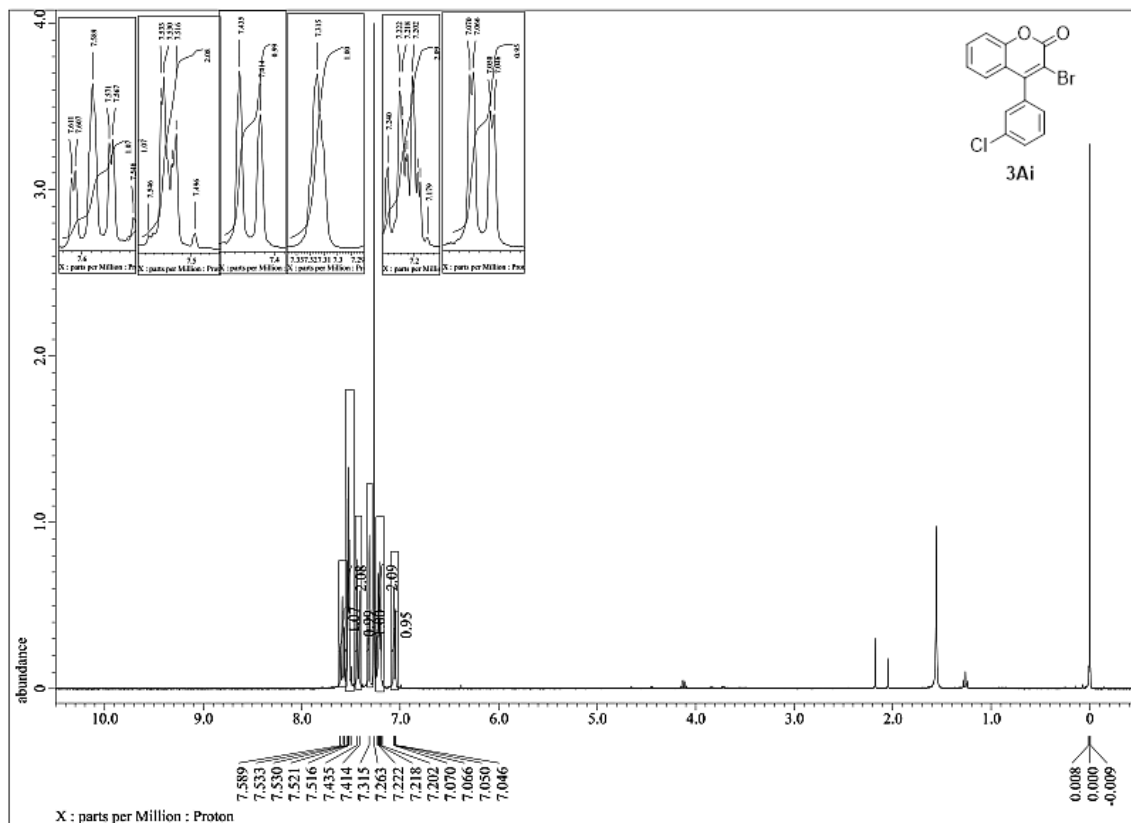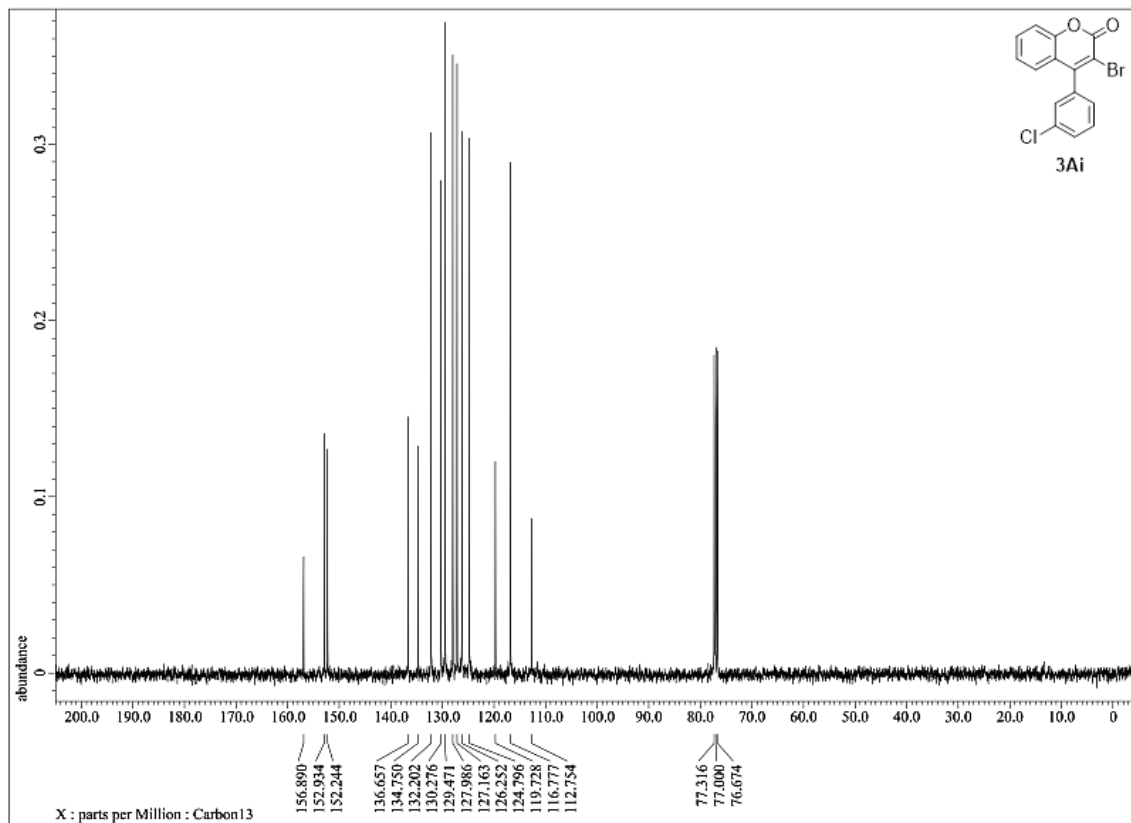

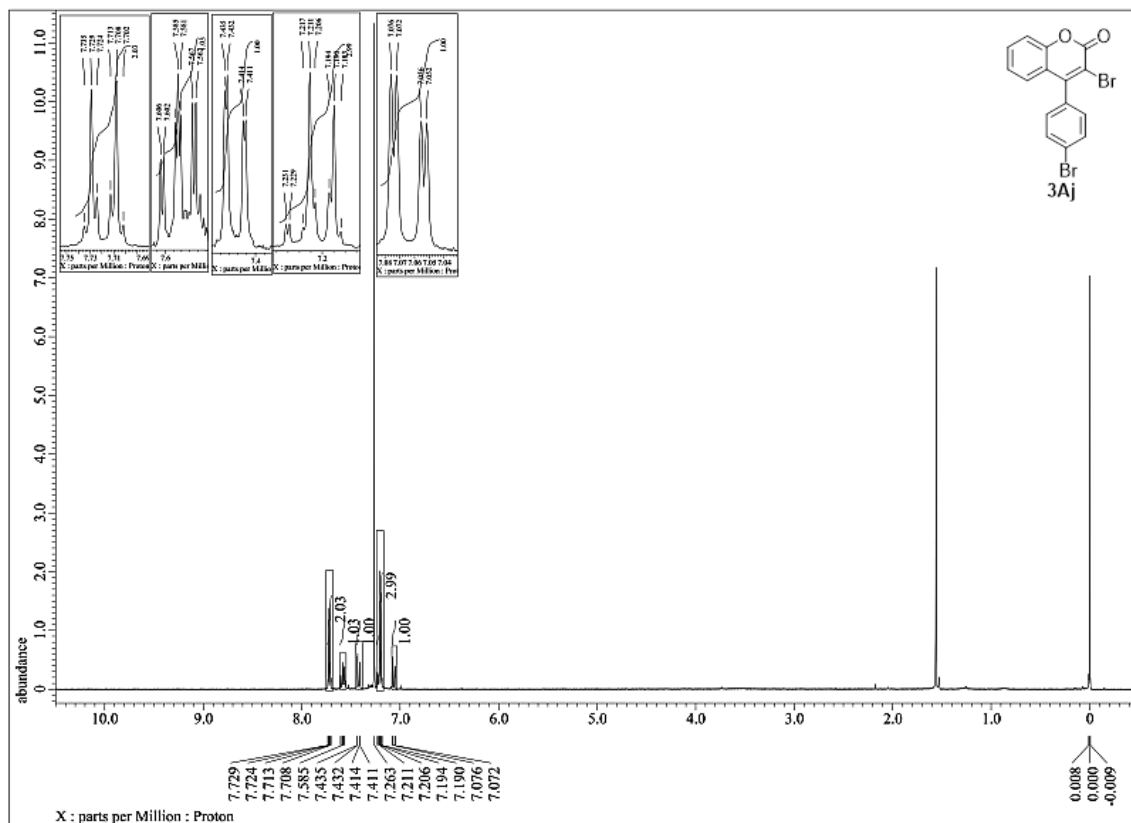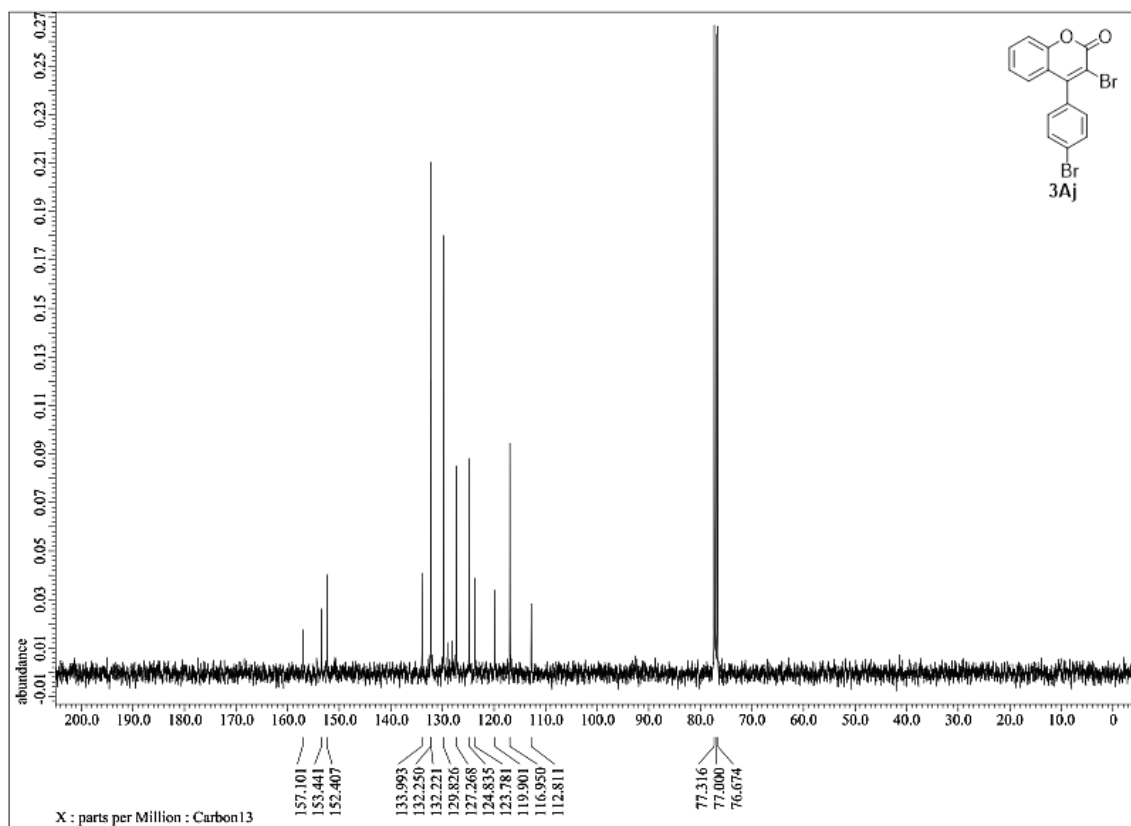

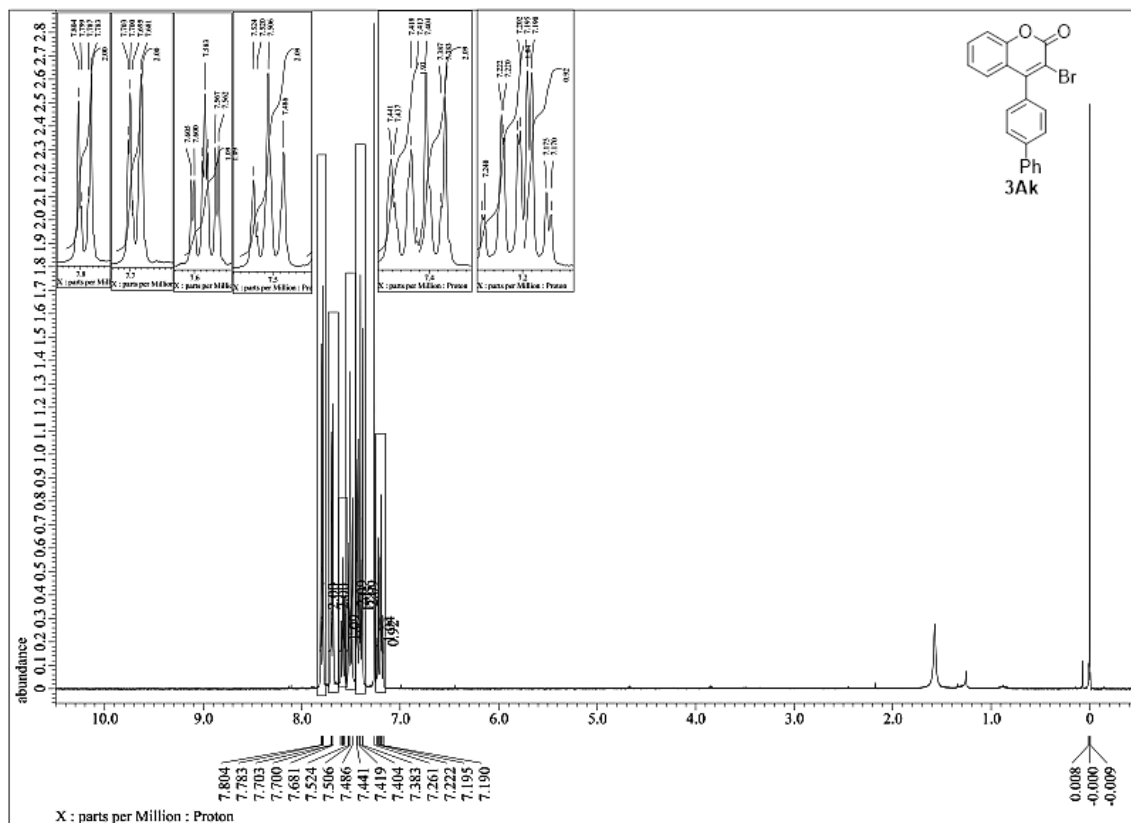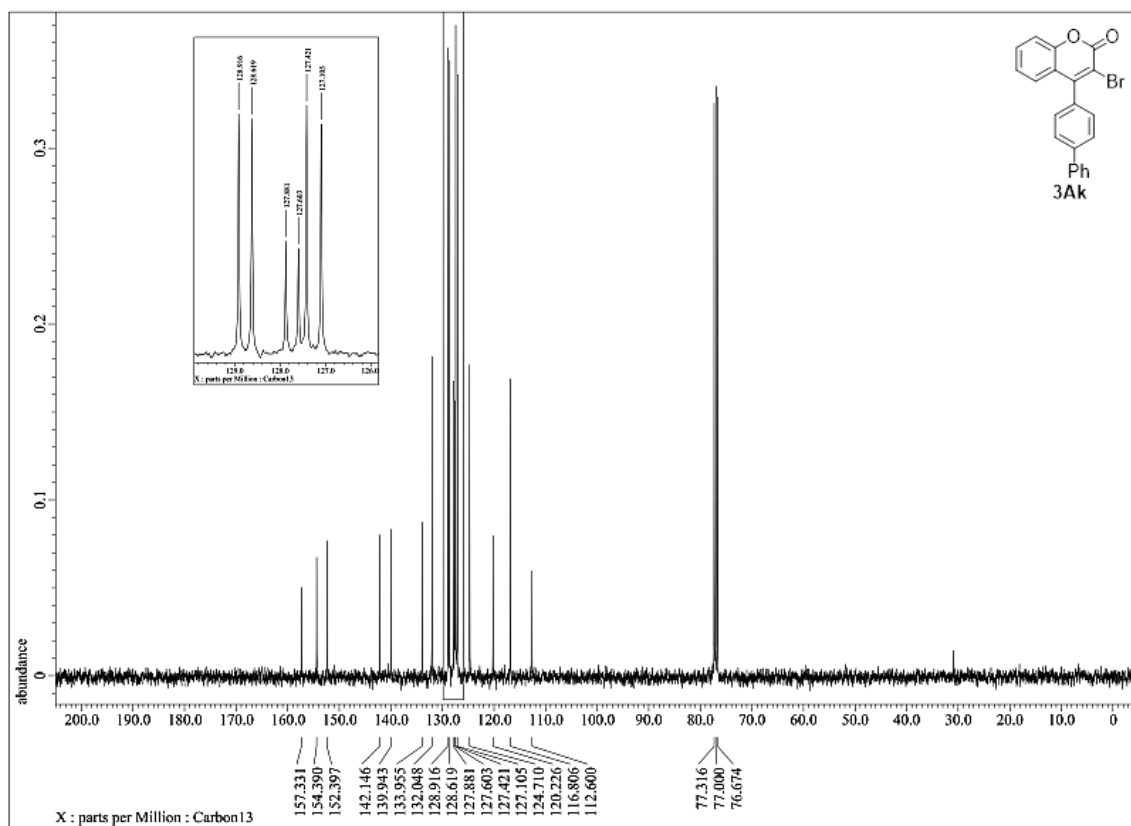



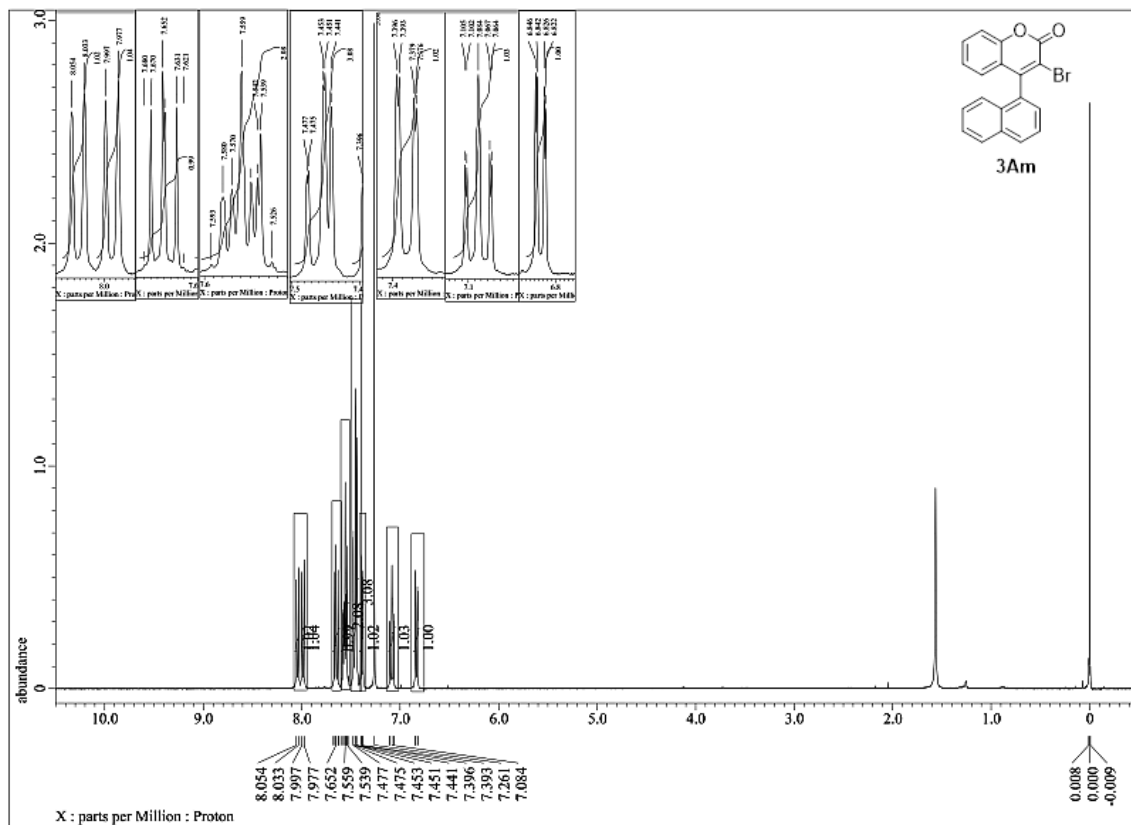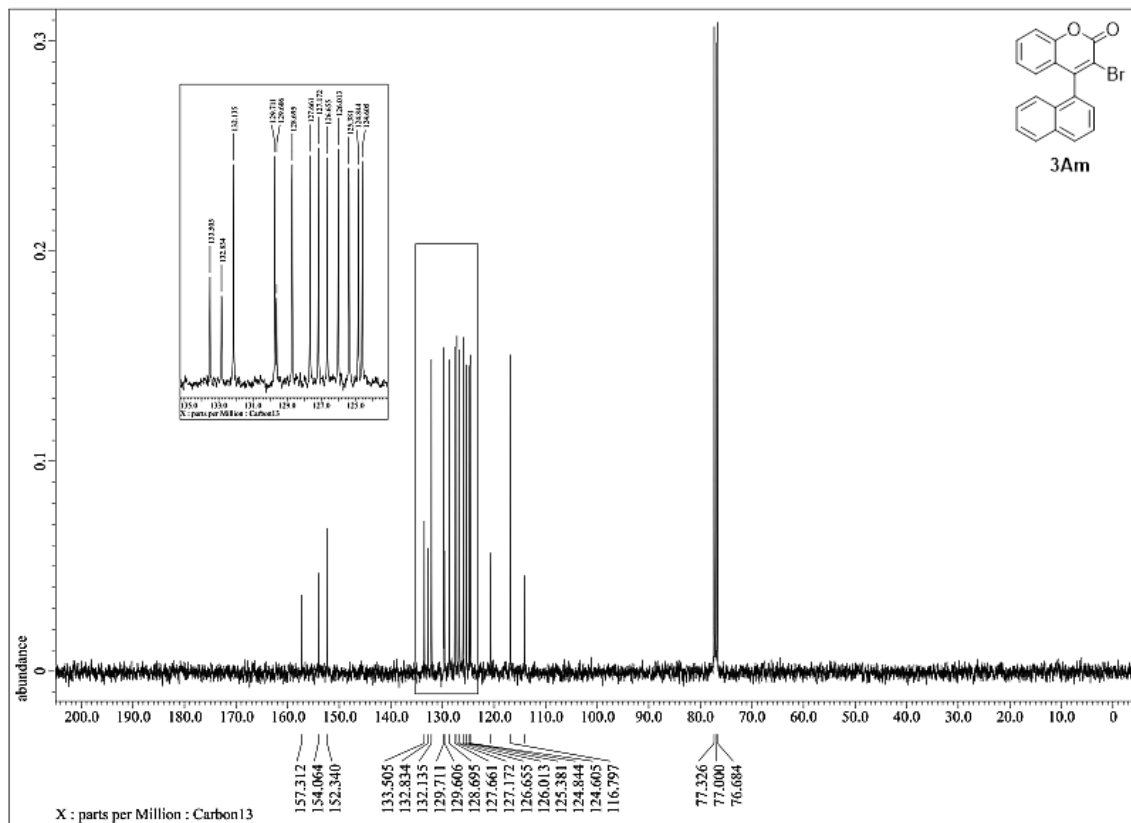

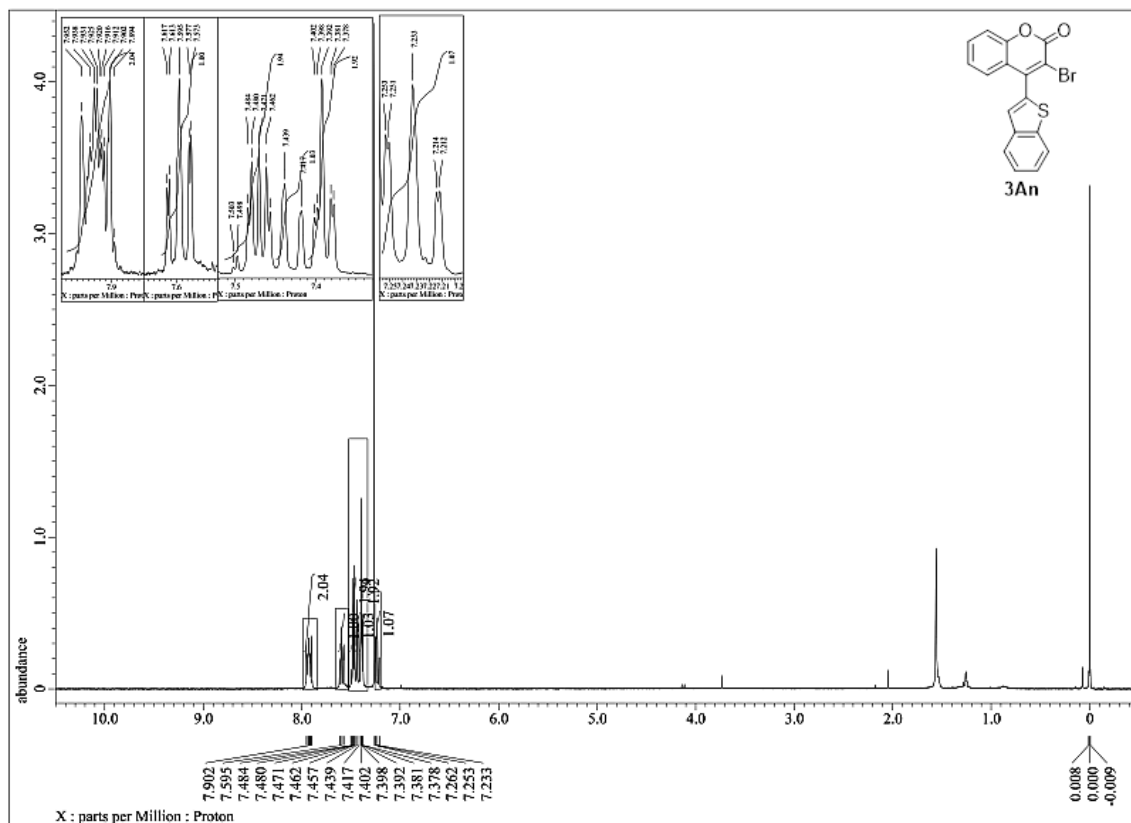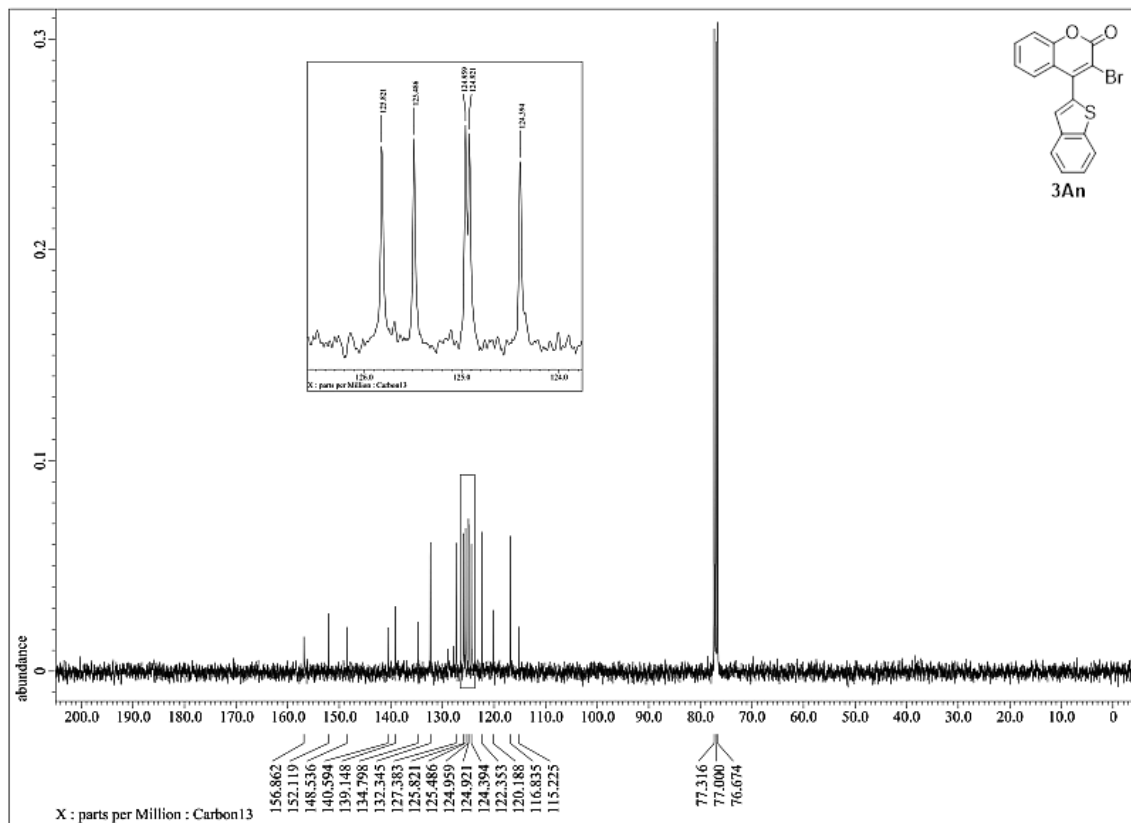



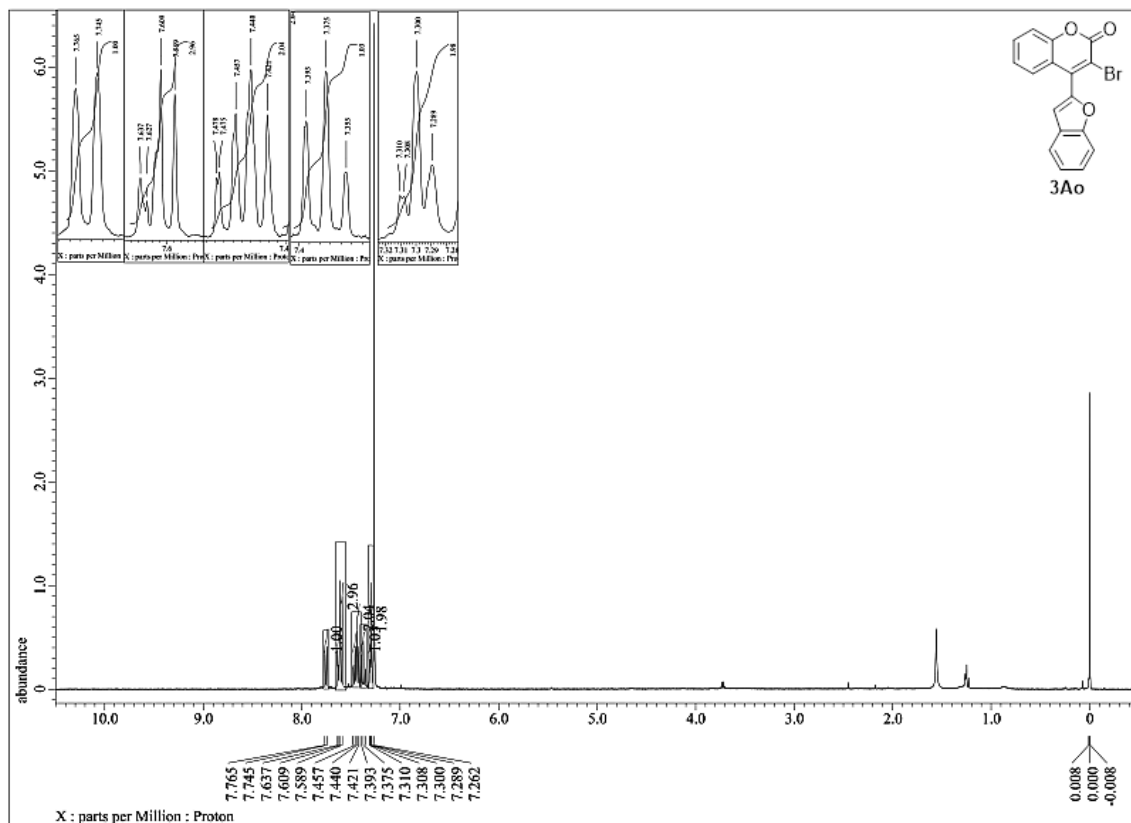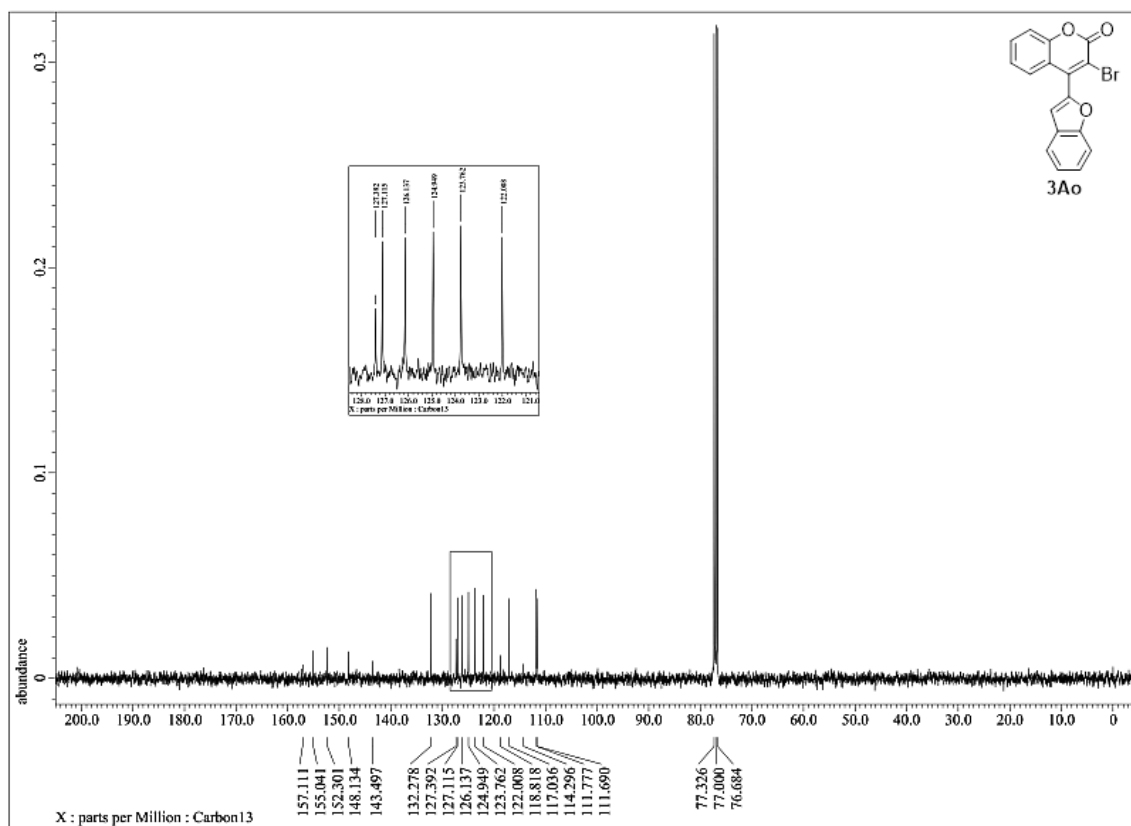

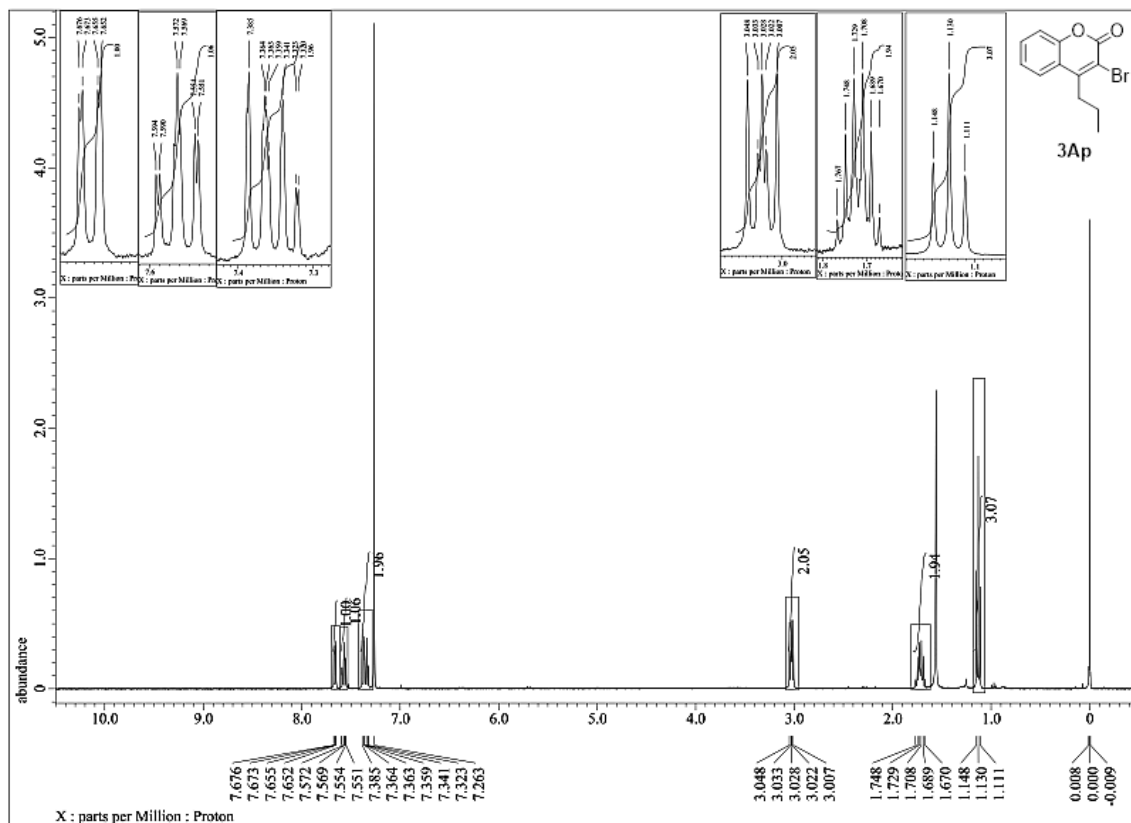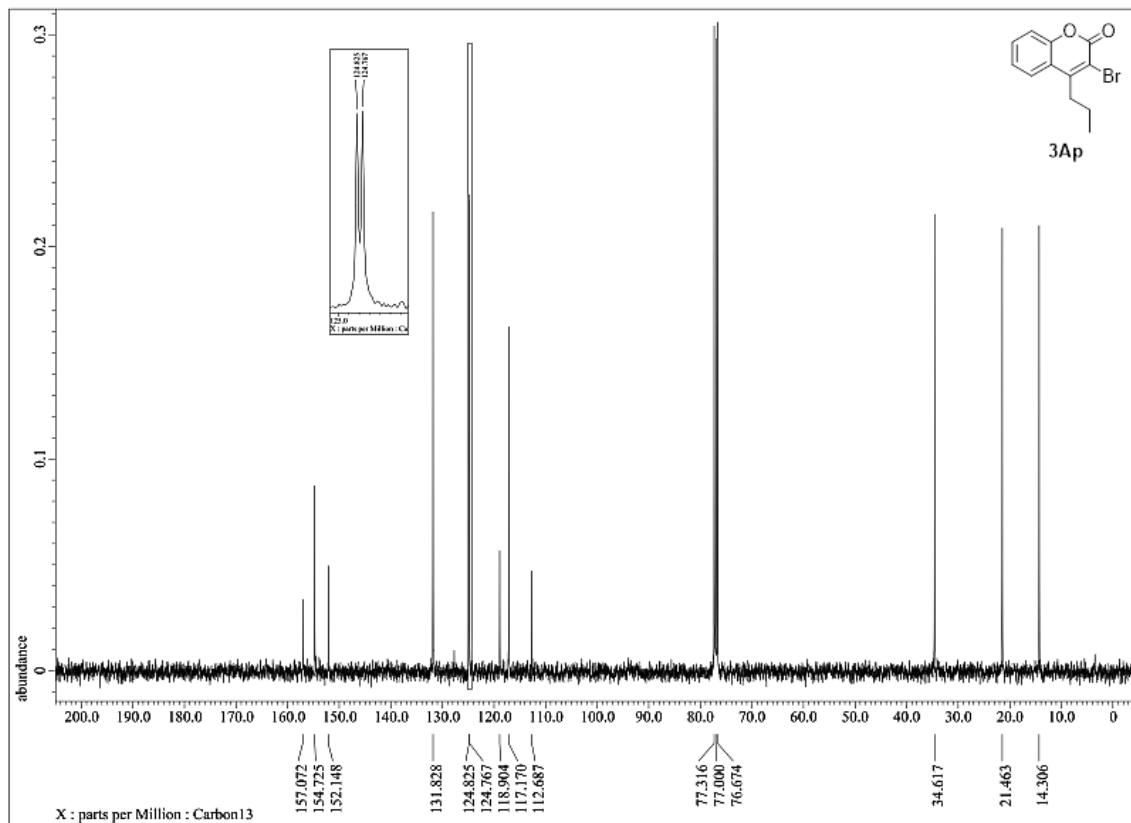



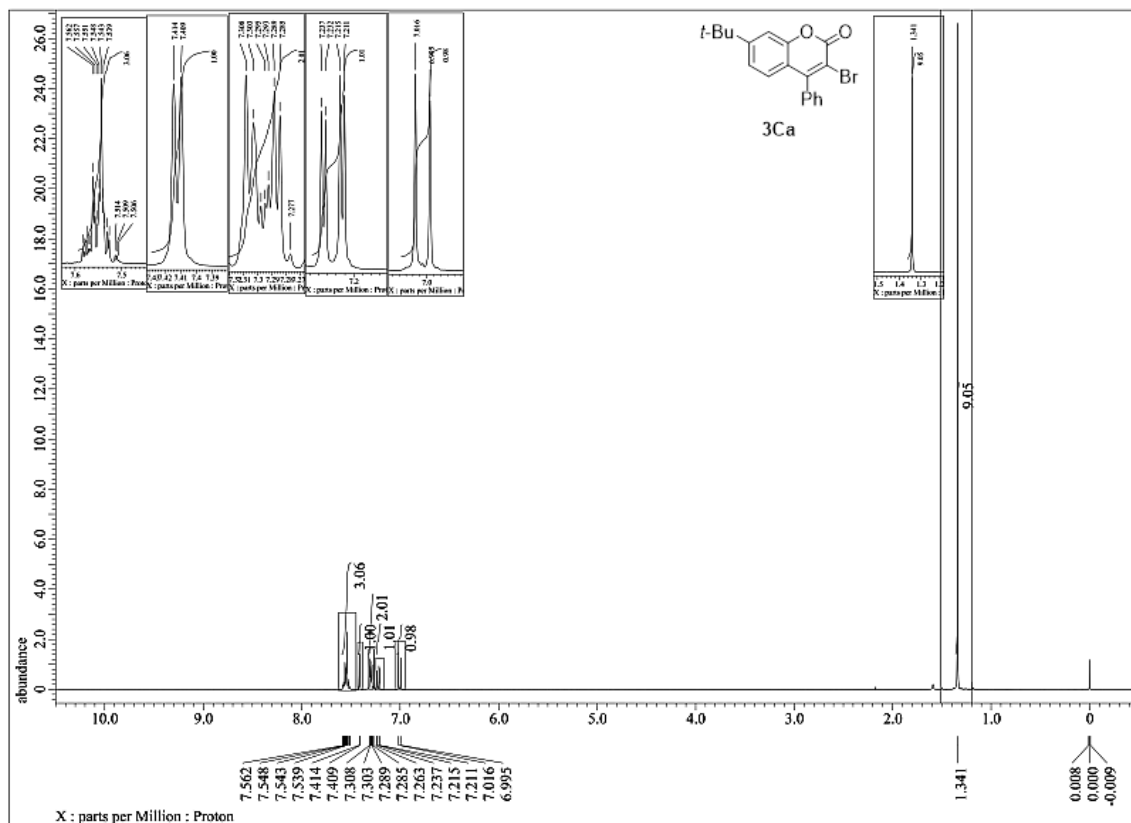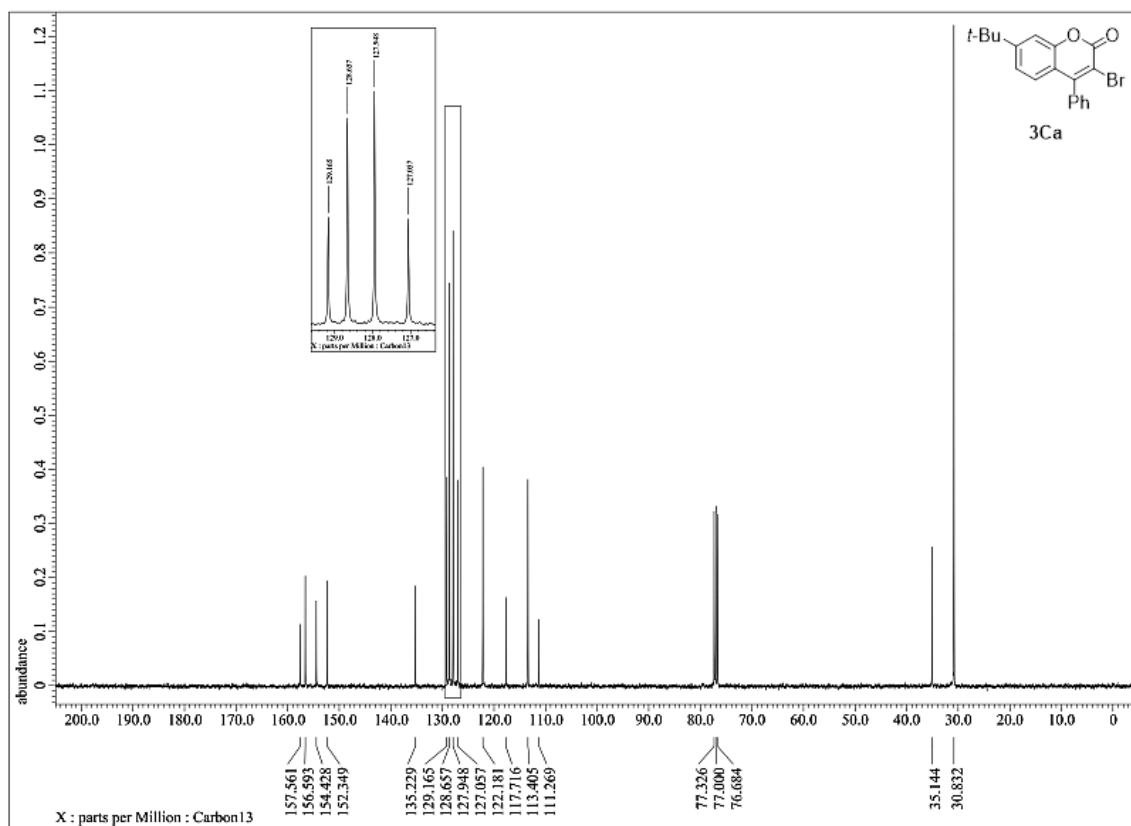



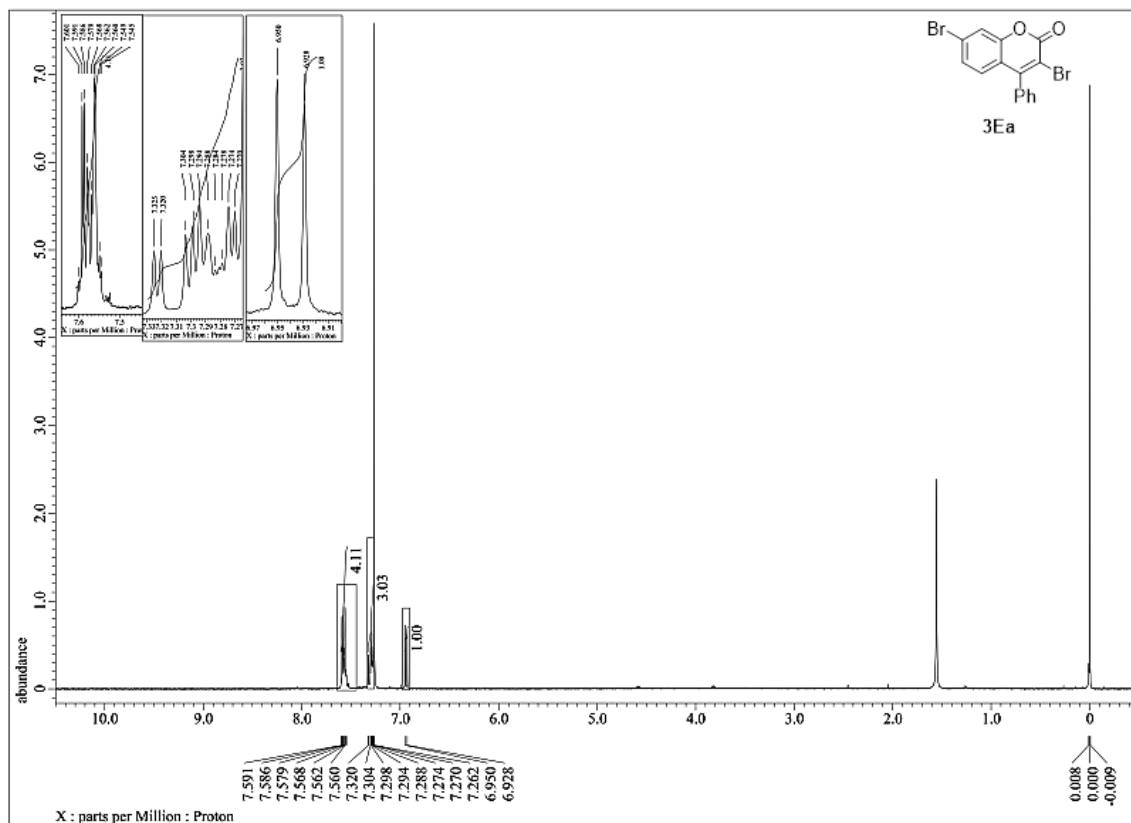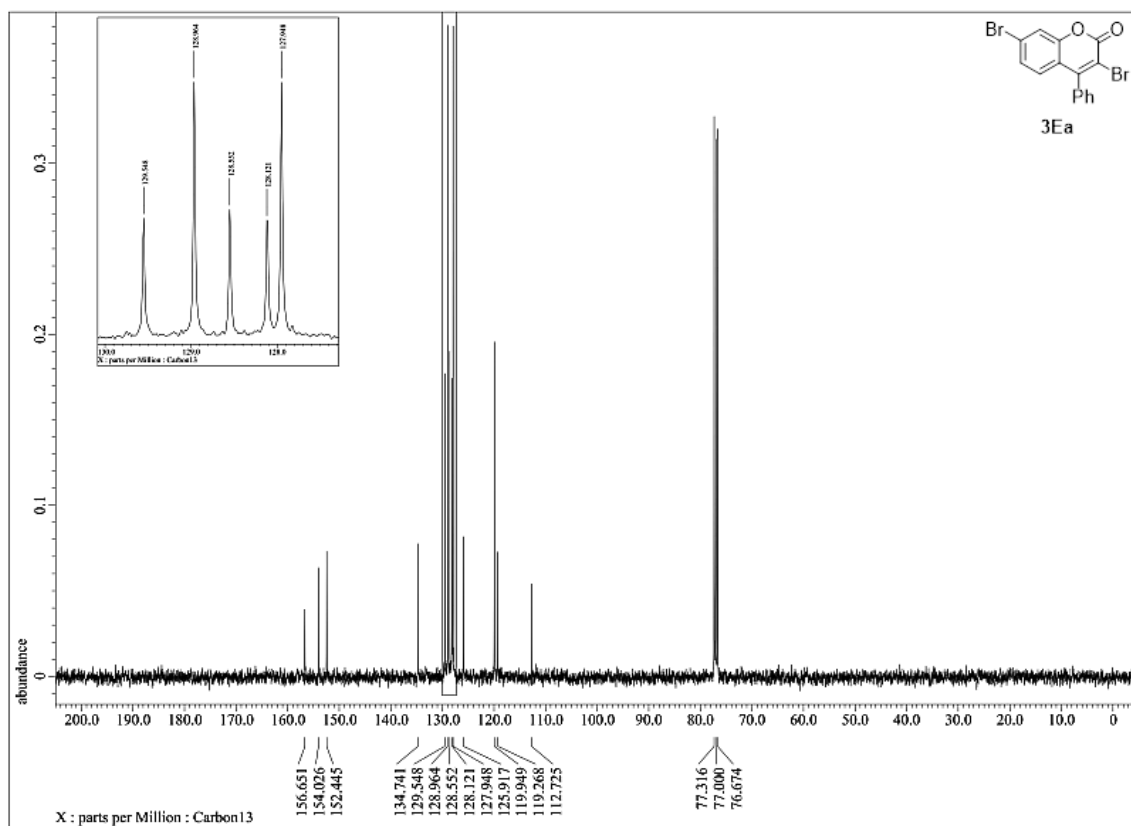

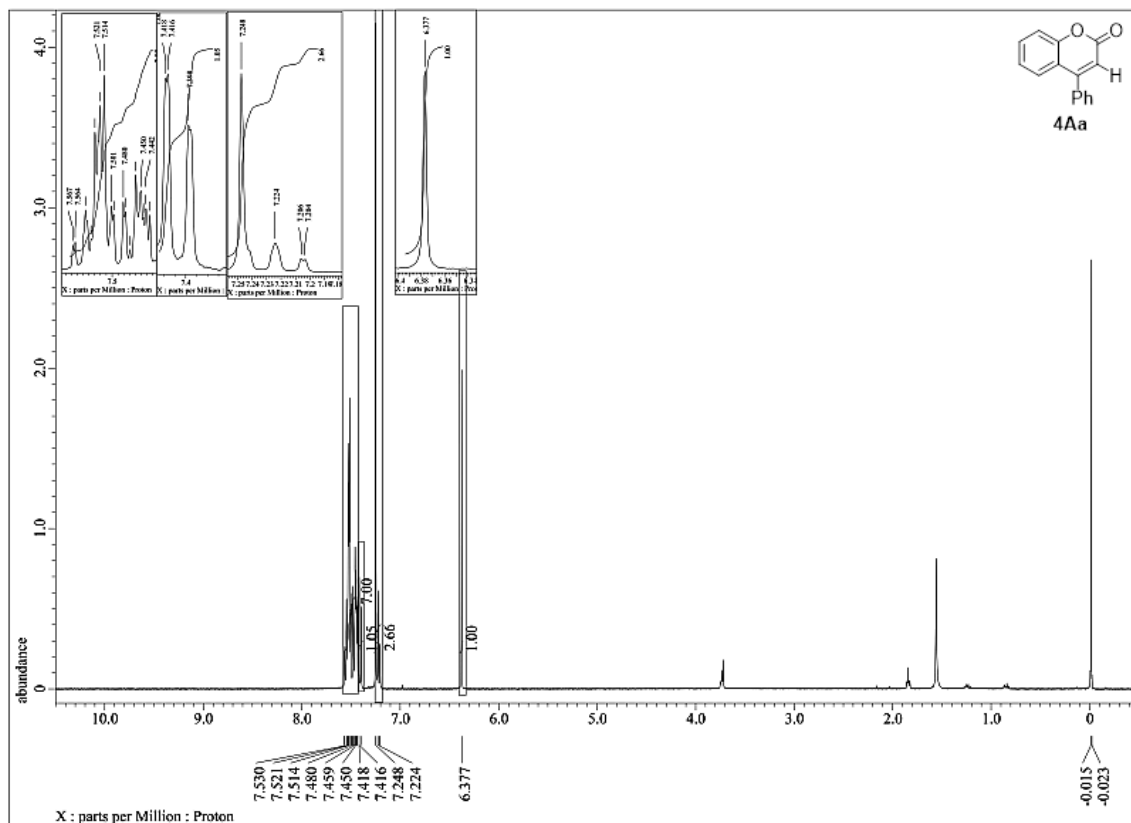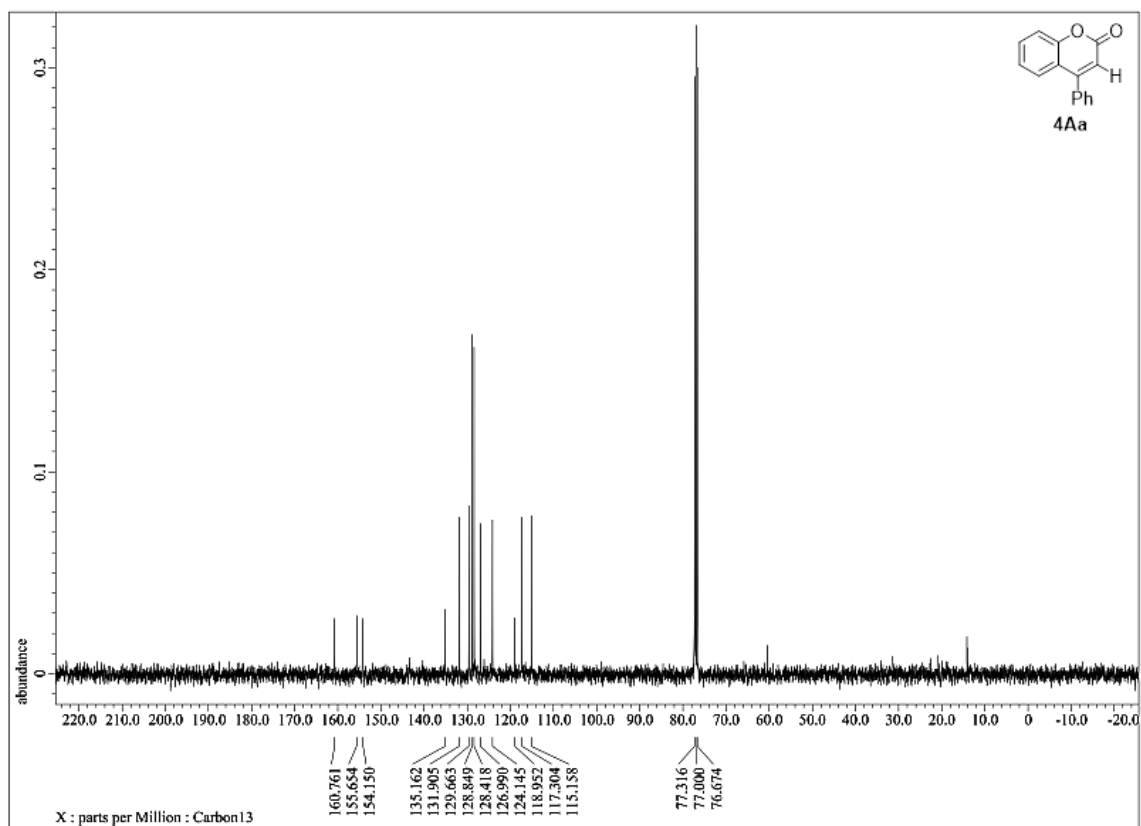

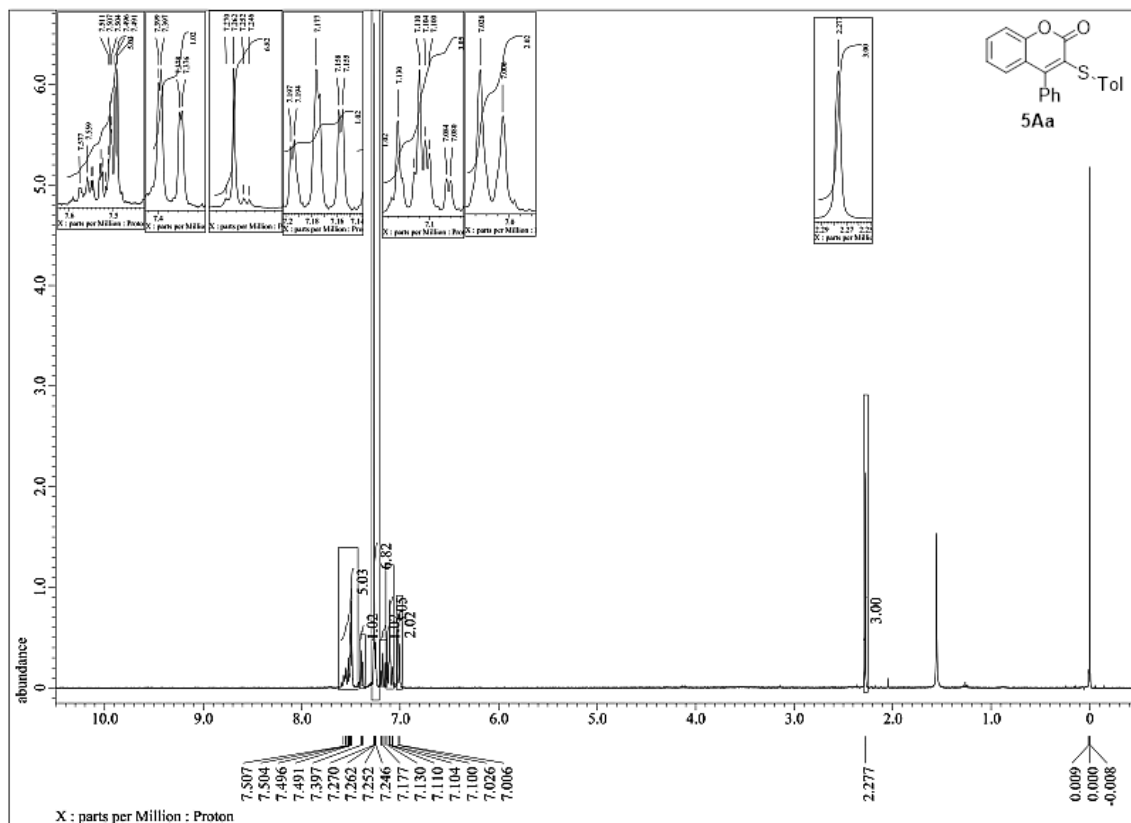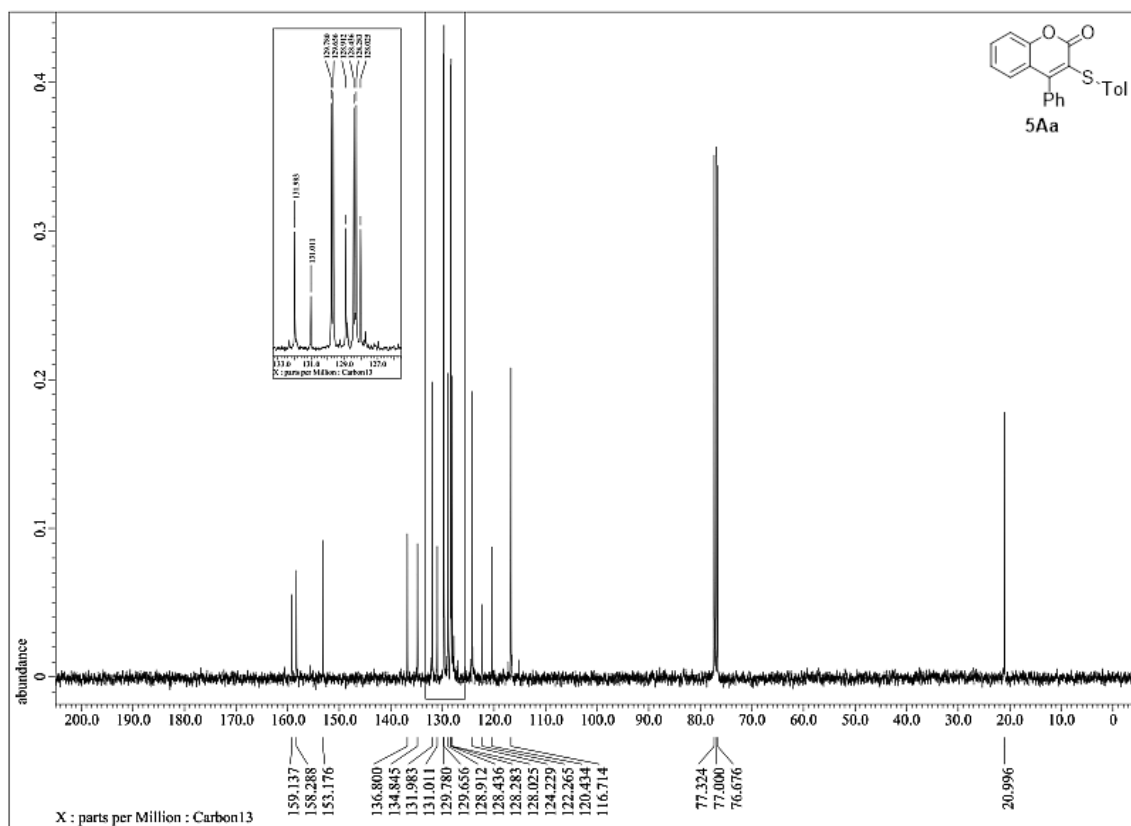



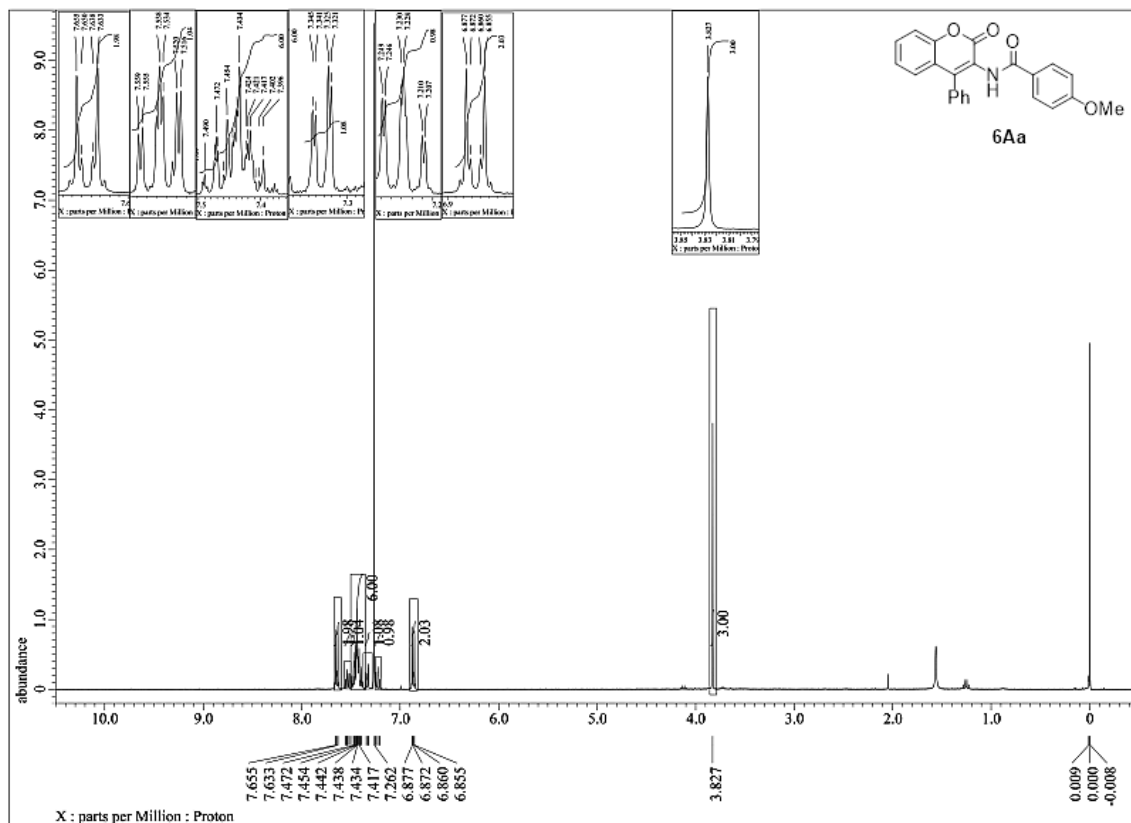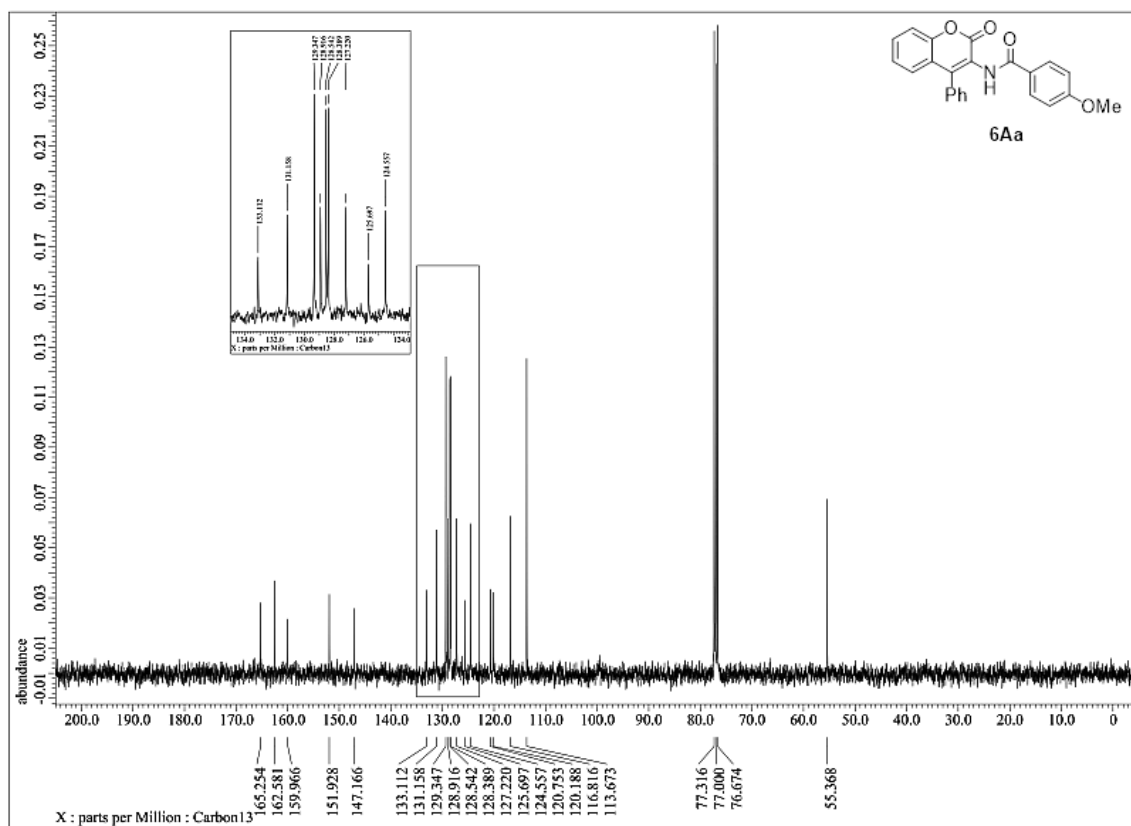

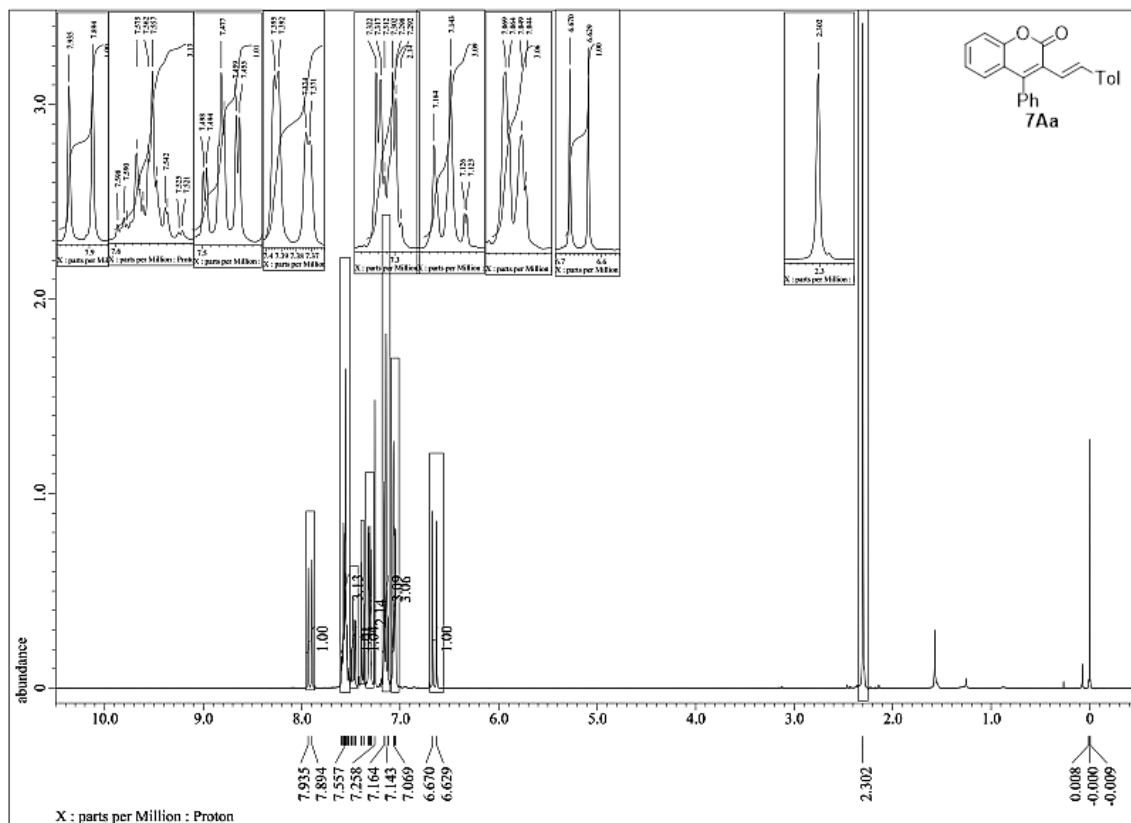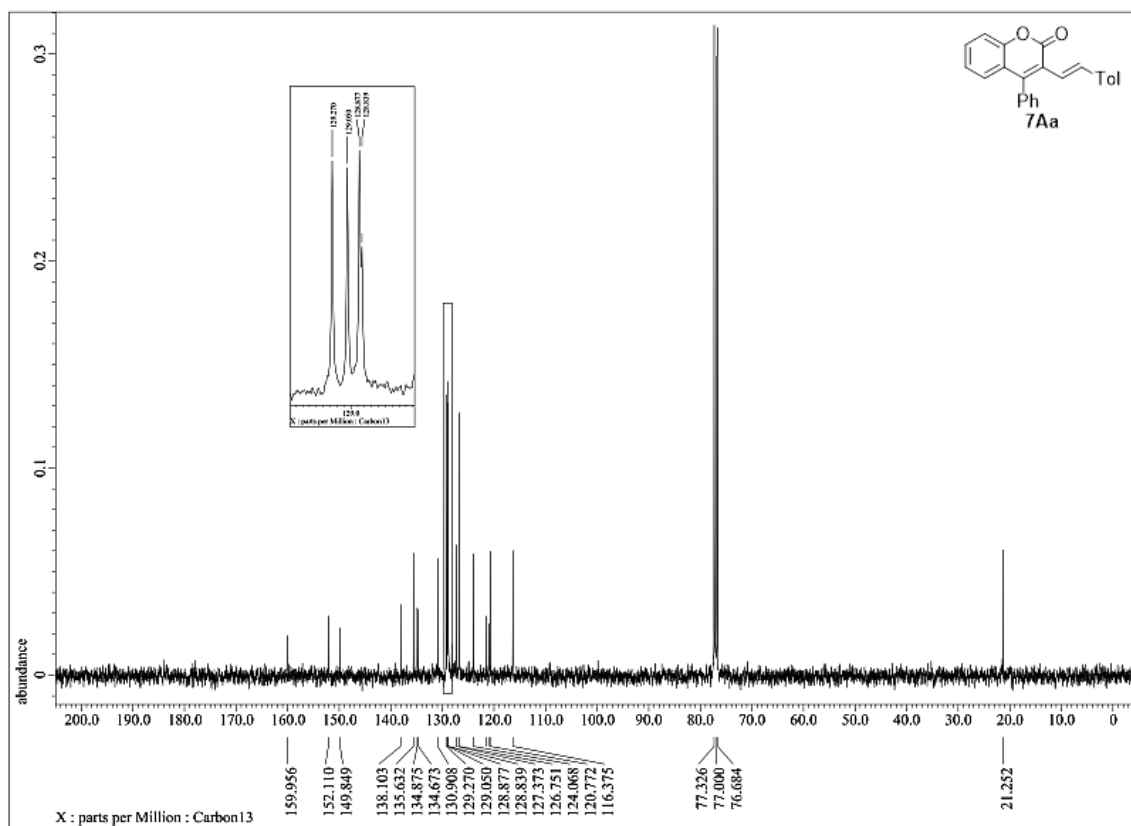

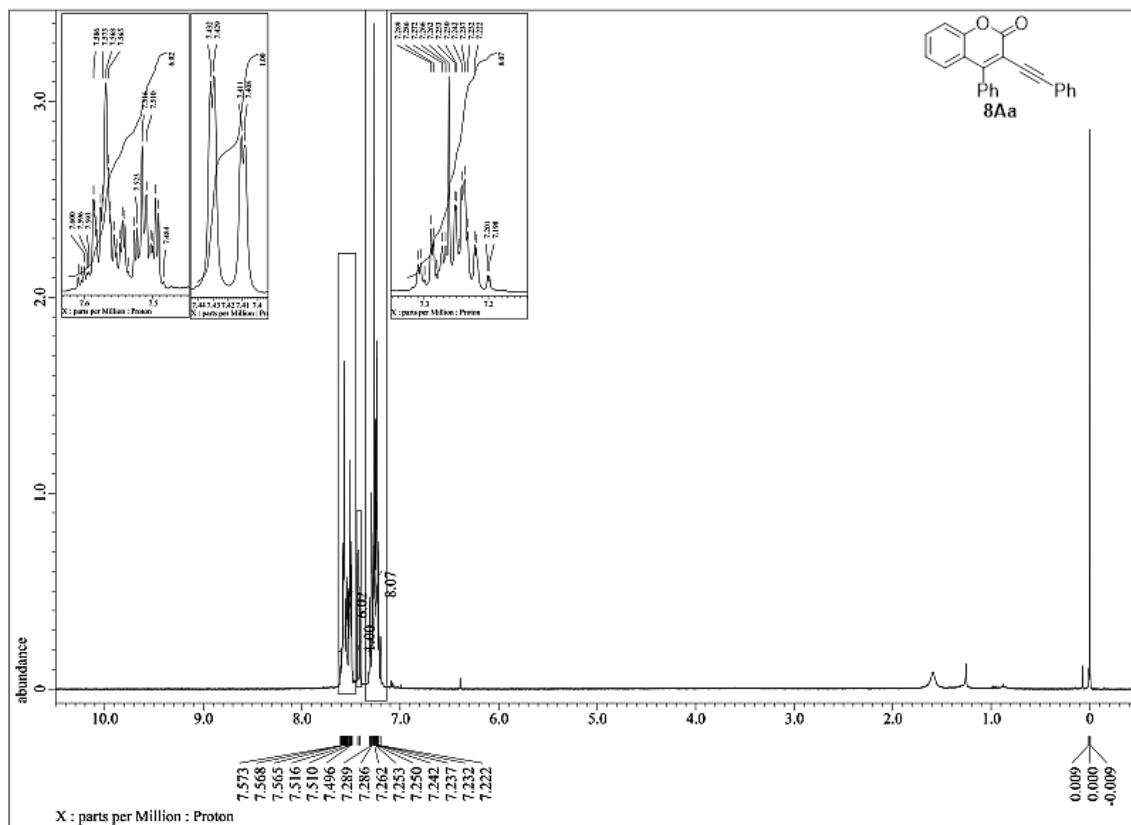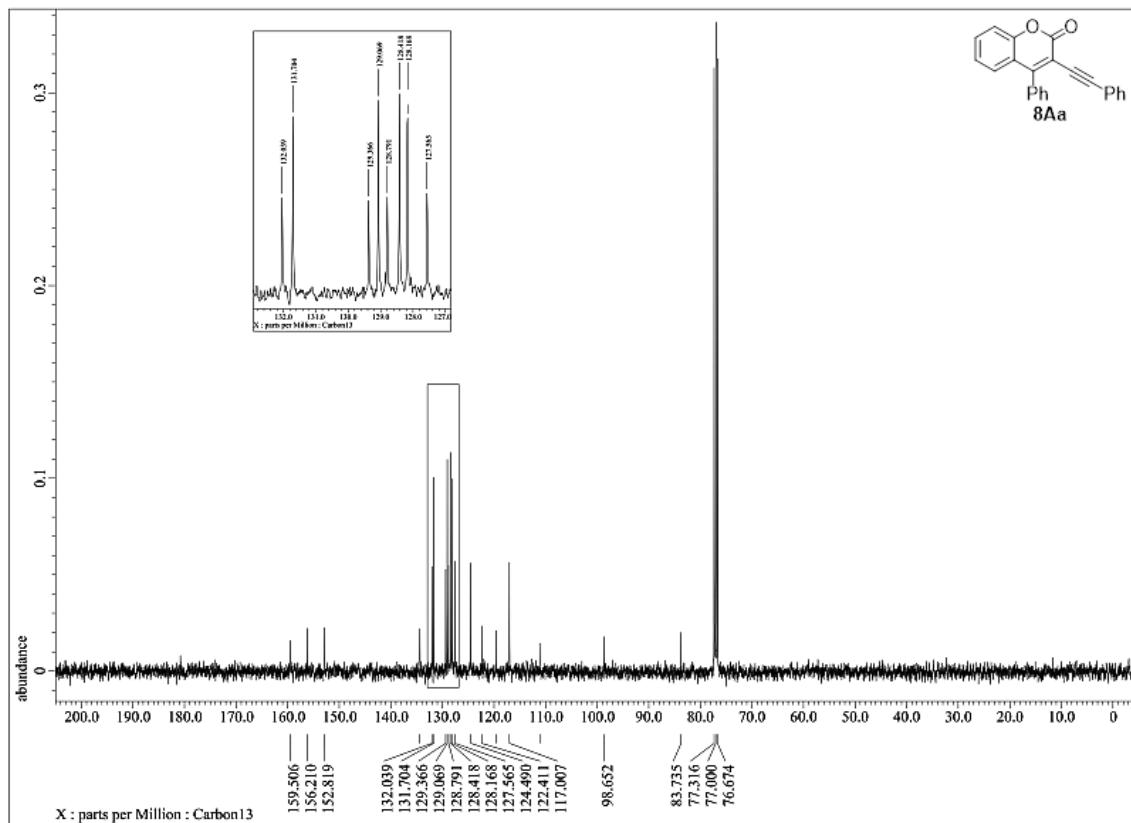

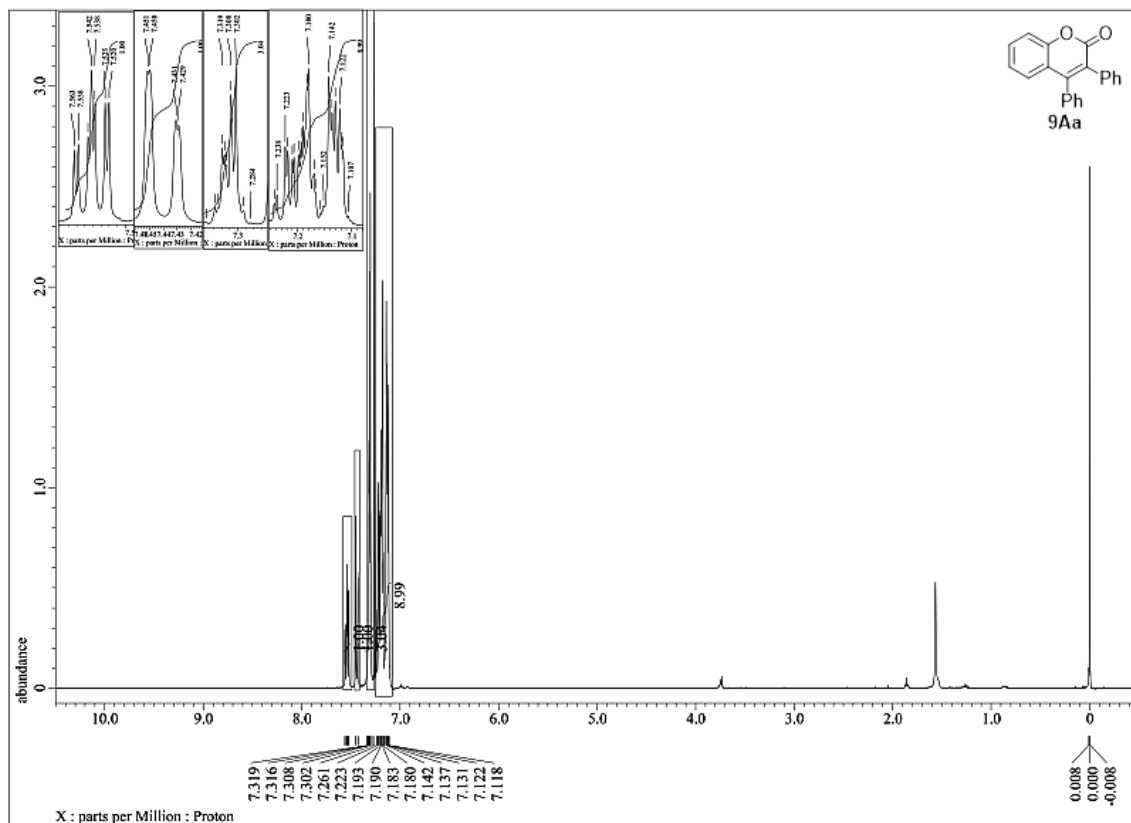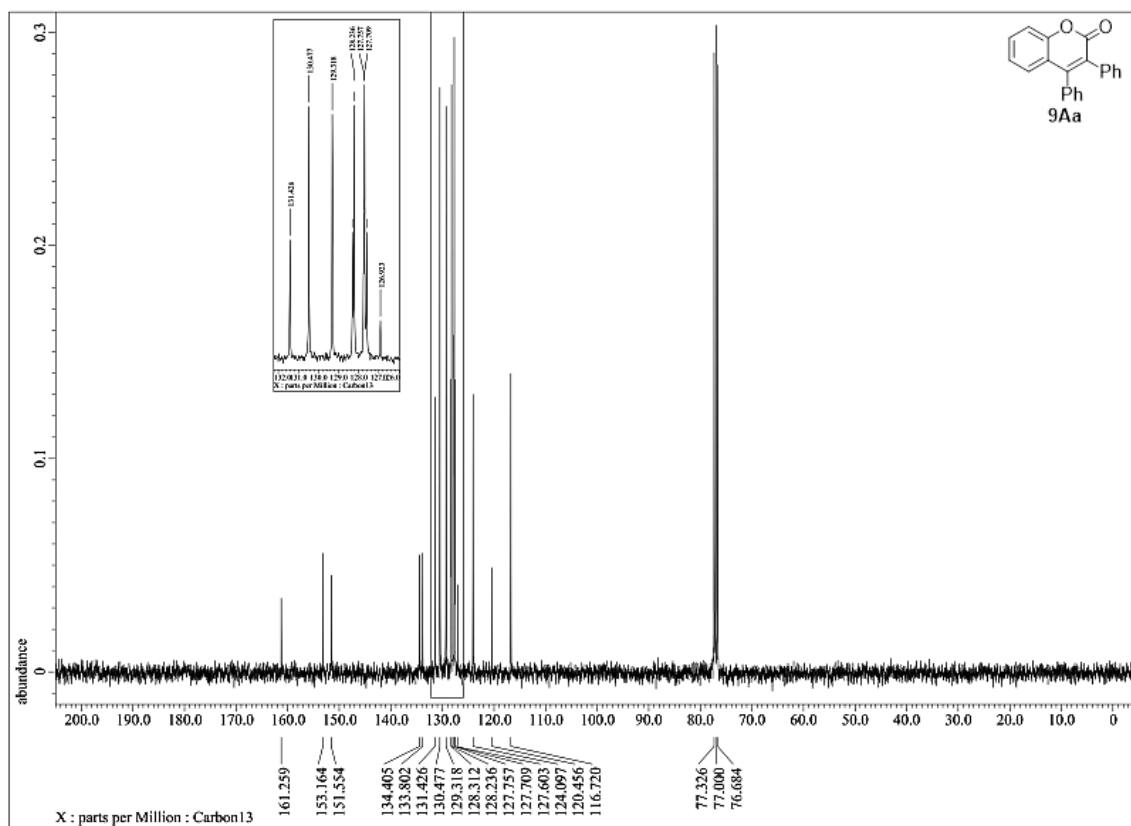

Supplement: Additional file 1 [file 1860-5397-14-22-S1.pdf]
